# Supplementary material
Source: PubMed Central journal article supplement (PMC5897187)

4A

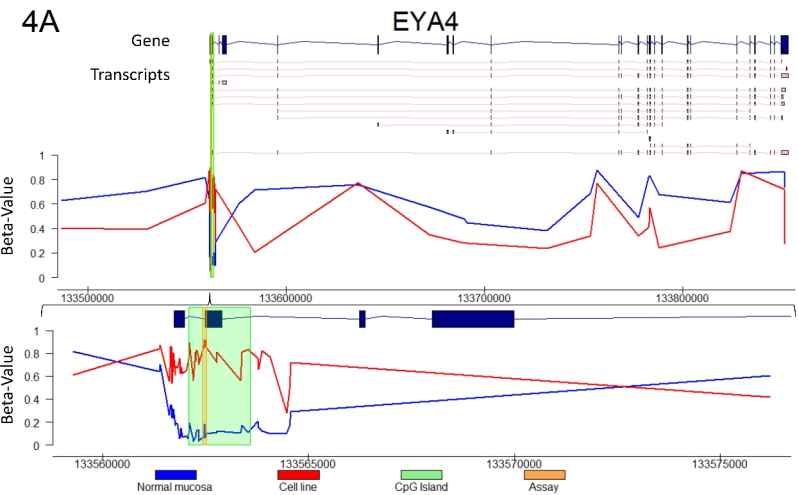

Threshold - GSE42752

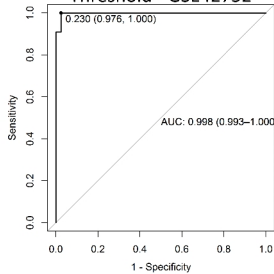

TCGA COREAD

p-value < 2e-16

|        | <0.230 | >0.230 | NPV | PPV |
|--------|--------|--------|-----|-----|
| Normal | 45     | 0      | 0.6 | 1   |
| Cancer | 26     | 389    |     |     |

4B

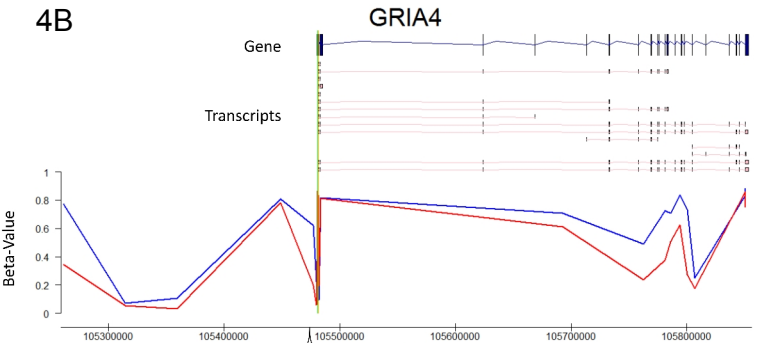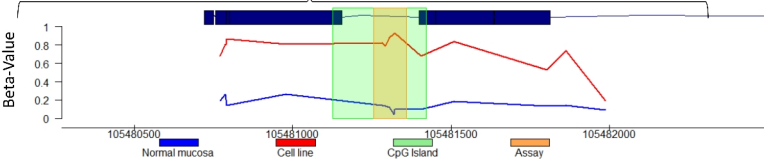

Threshold - GSE42752

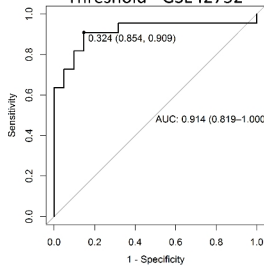

TCGA COREAD

p-value &lt; 2e-16 &lt;0.324 &gt;0.324 NPV PPV

|        |    |     |     |   |
|--------|----|-----|-----|---|
| Normal | 45 | 0   | 0.7 | 1 |
| Cancer | 16 | 399 |     |   |

4C

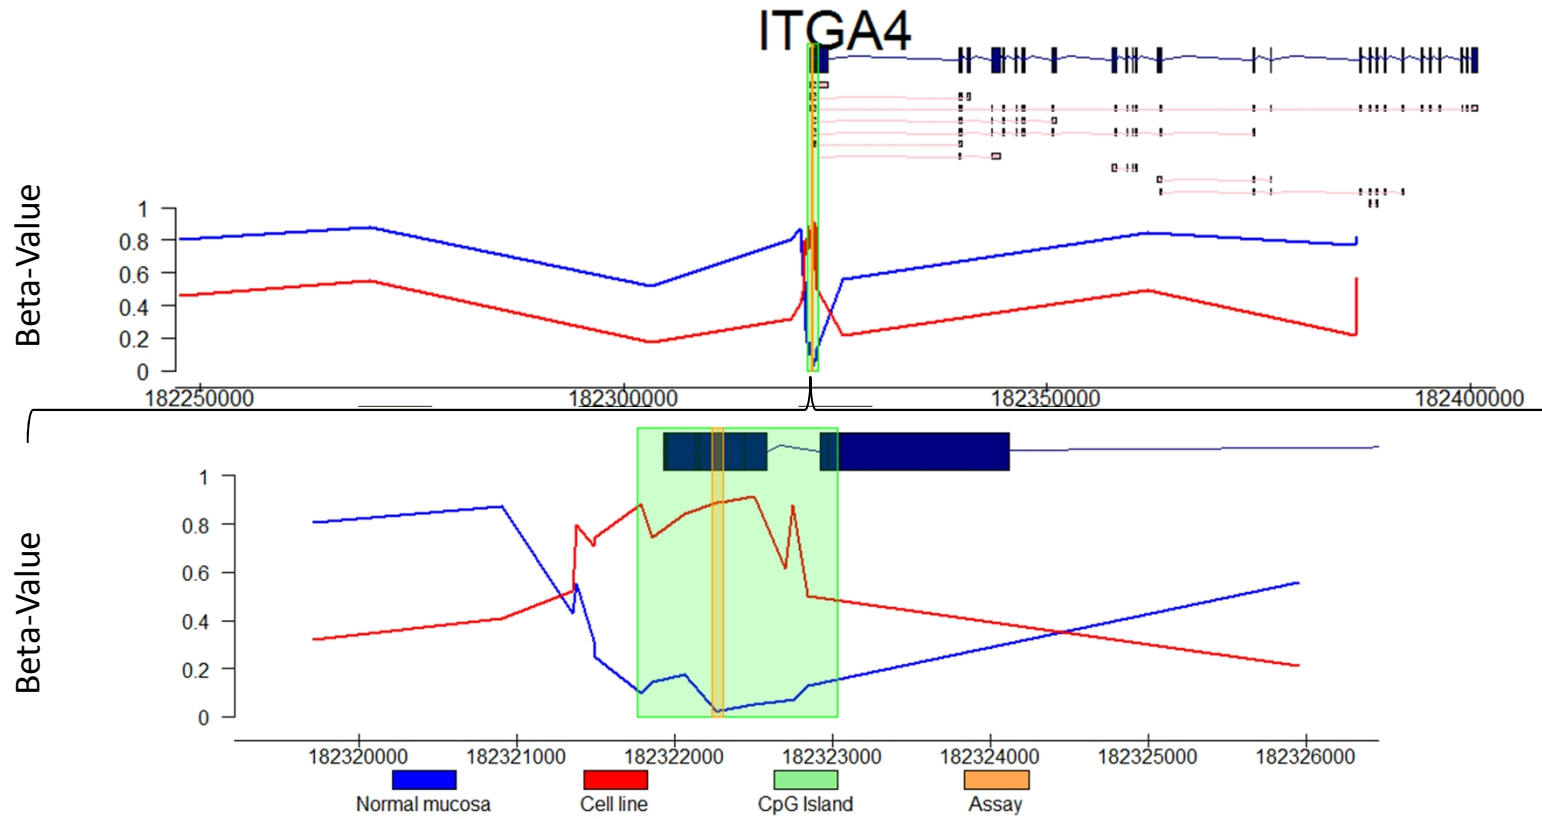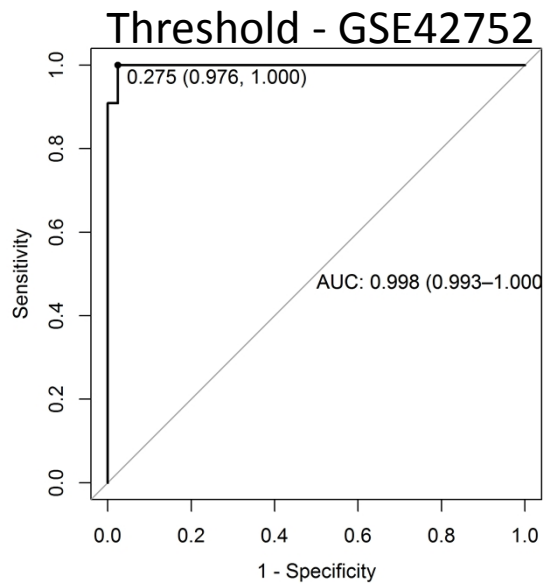

**TCGA COREAD**

| p-value < 2e-16 | <0.275 | >0.275 | NPV | PPV |
|-----------------|--------|--------|-----|-----|
| <b>Normal</b>   | 45     | 0      | 0.8 | 1   |
| <b>Cancer</b>   | 9      | 403    |     |     |

4D

MAP3K14-AS1

Gene

Transcripts

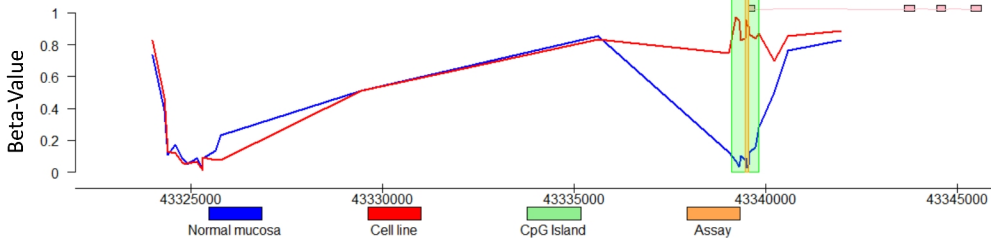

Threshold - GSE42752

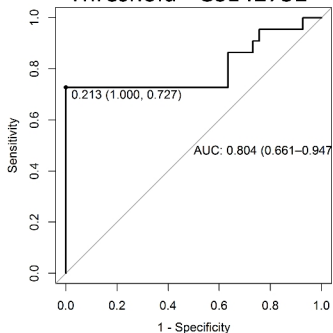

TCGA COREAD

p-value &lt; 2e-16

|        | <0.213 | >0.213 | NPV | PPV |
|--------|--------|--------|-----|-----|
| Normal | 45     | 0      | 0.5 | 1   |
| Cancer | 39     | 376    |     |     |

4E

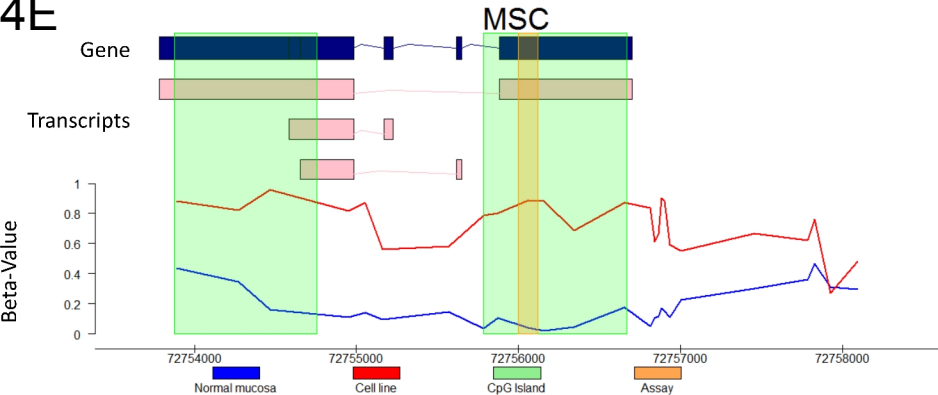

Threshold - GSE42752

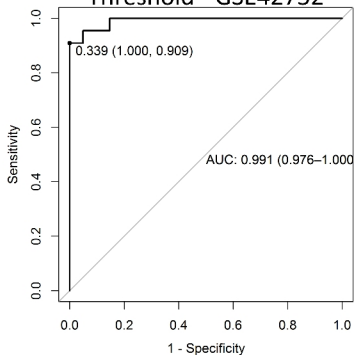

TCGA COREAD

p-value &lt; 2e-16

|               | <0.339 | >0.339 | NPV | PPV |
|---------------|--------|--------|-----|-----|
| <b>Normal</b> | 45     | 0      | 0.7 | 1   |
| <b>Cancer</b> | 19     | 396    |     |     |

4F

EYA4

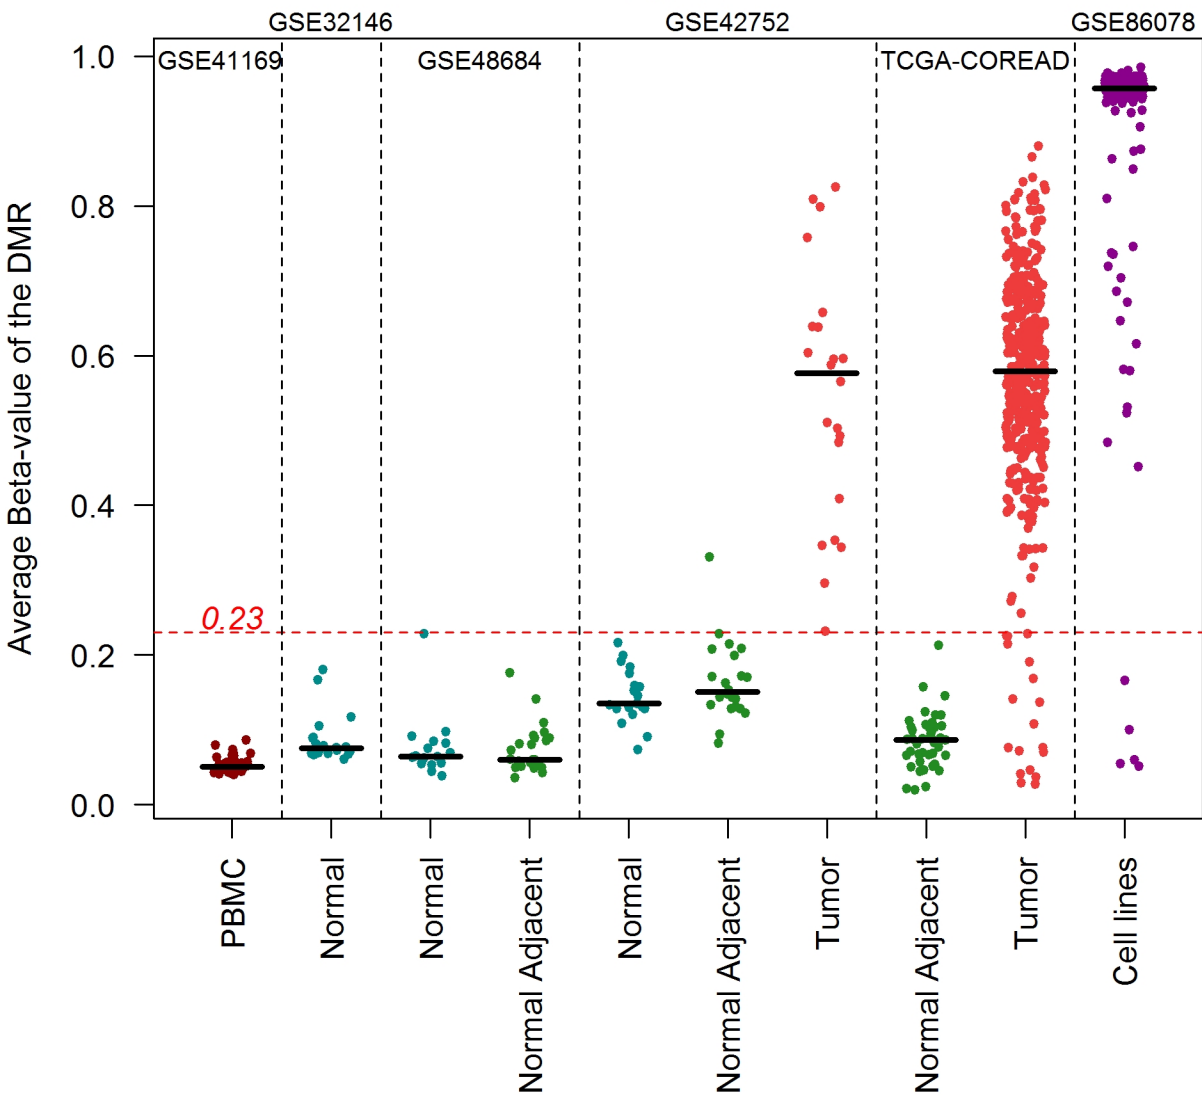

4G

# GRIA4

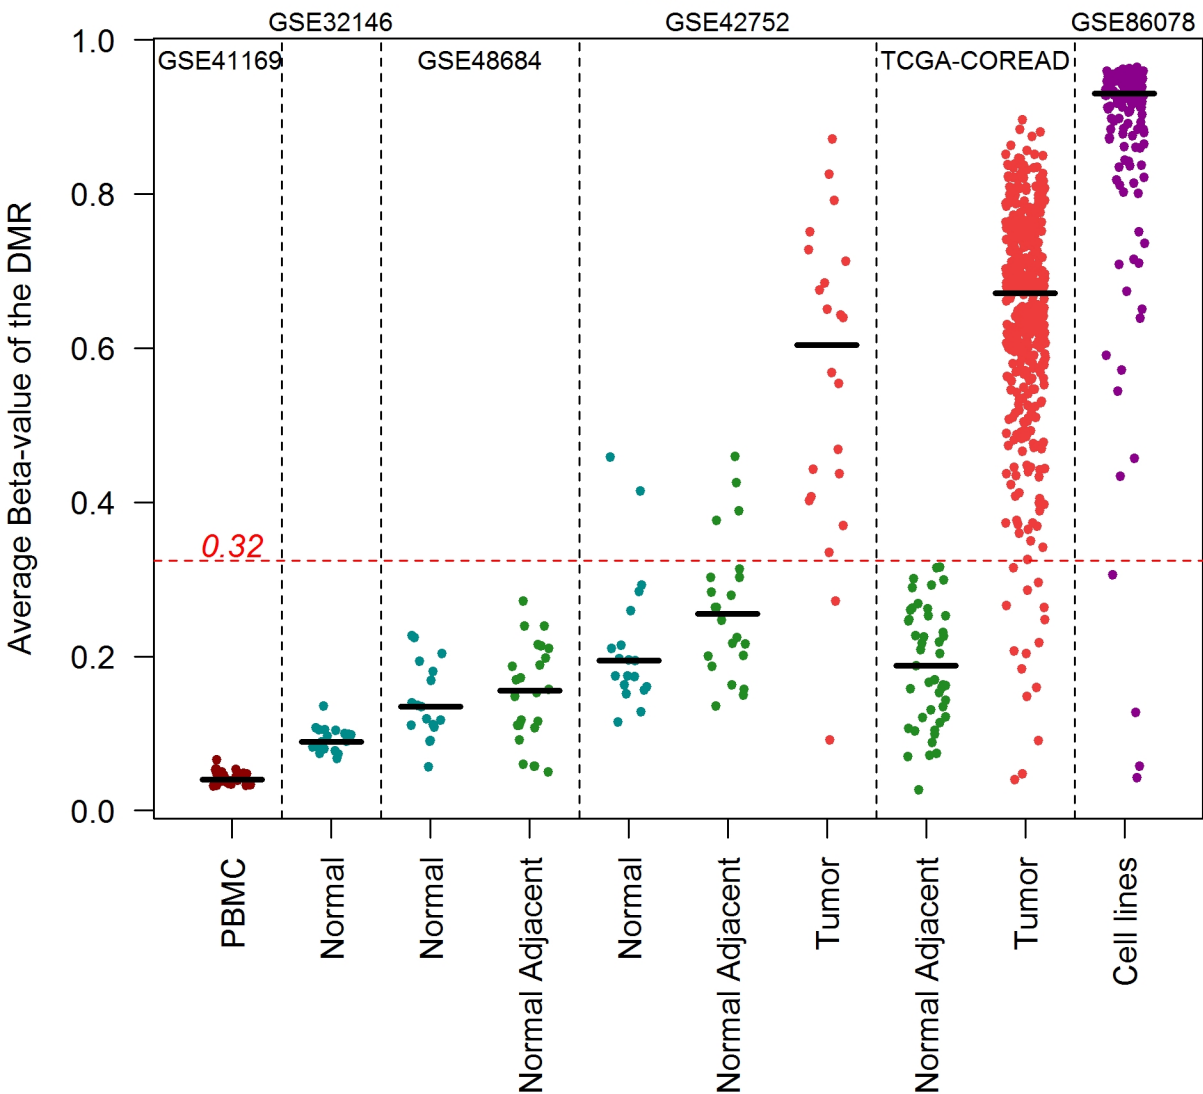

4H

# ITGA4

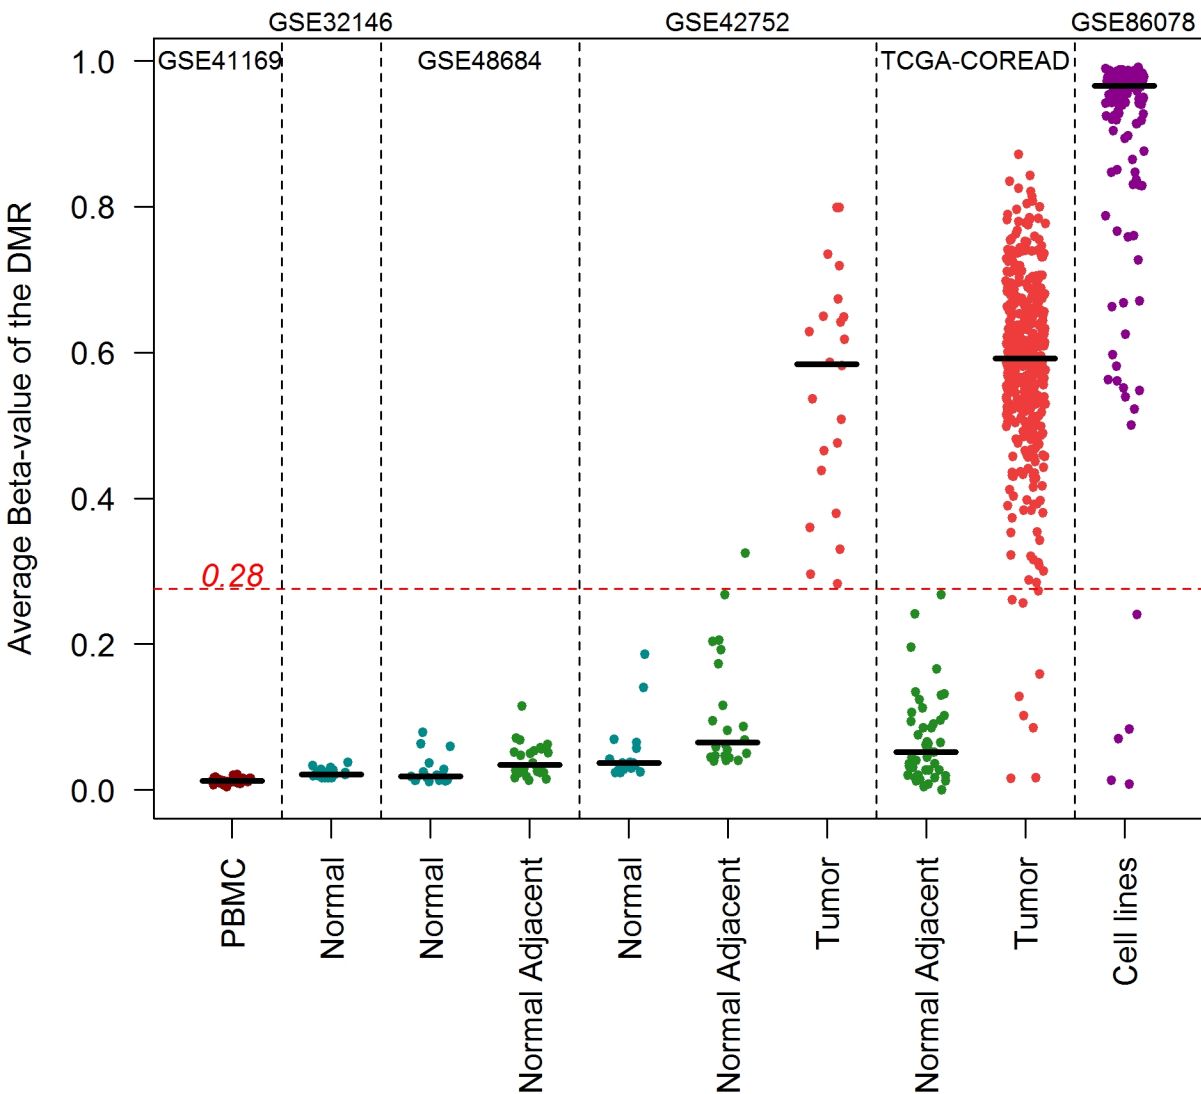



41

## MAP3K14-AS1

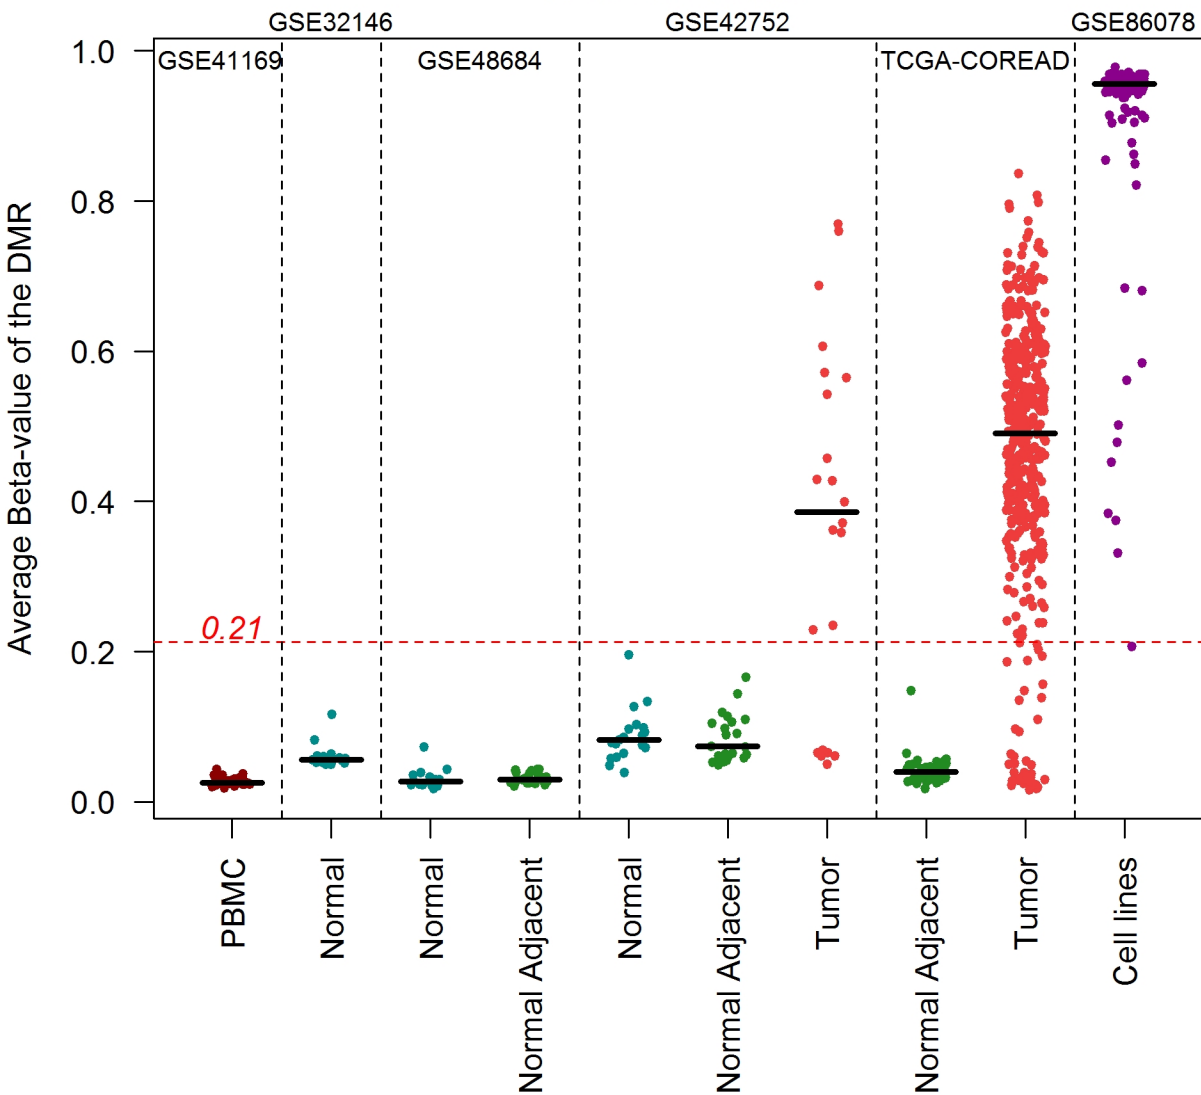

4J

MSC

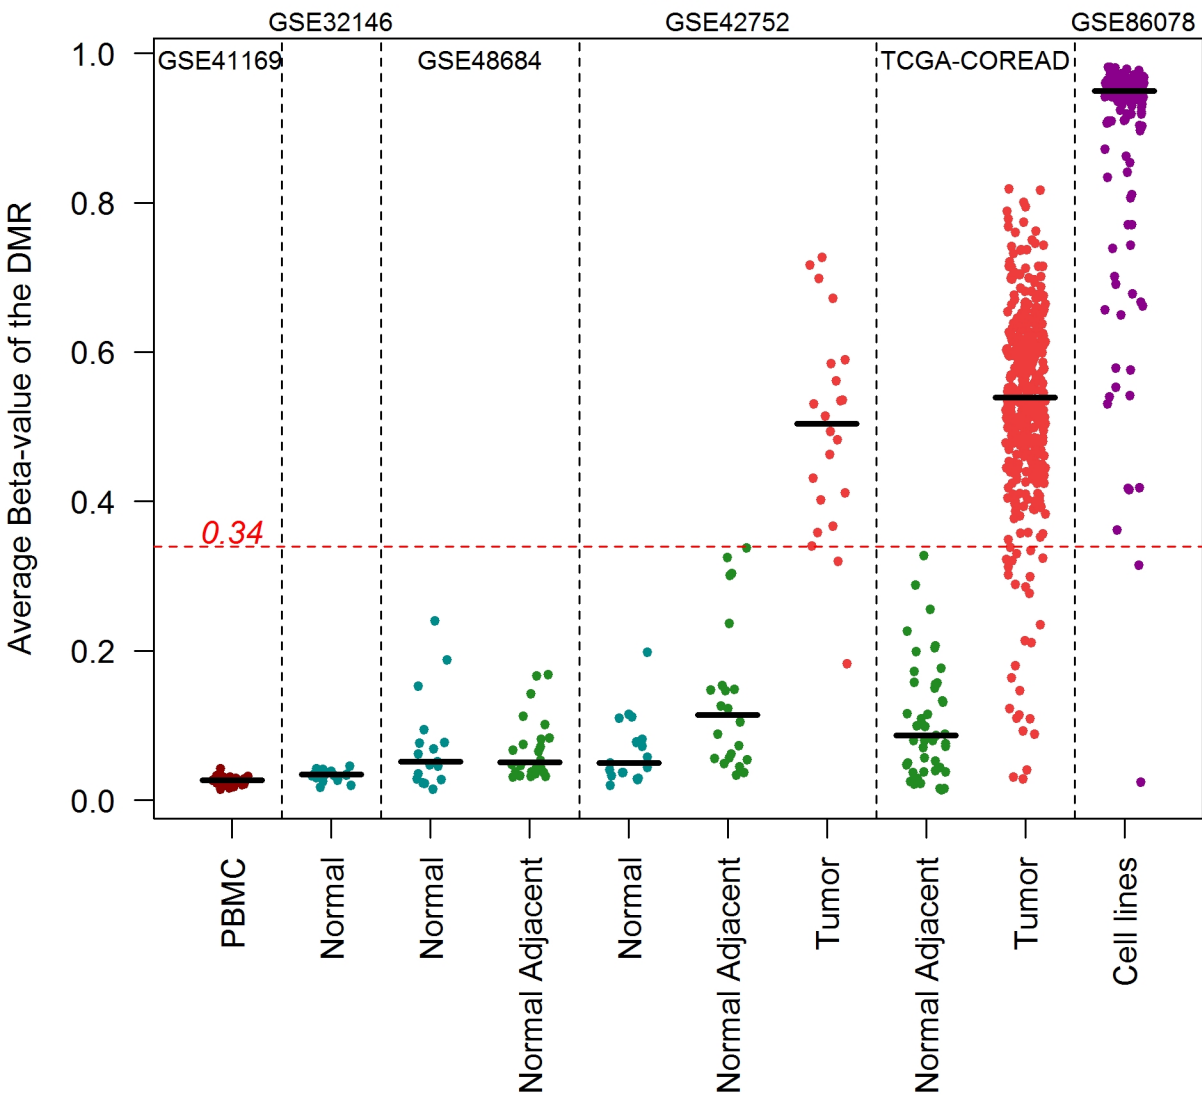

Supplement: NIHMS948637-supplement-Suppl_File_4.pdf [file NIHMS948637-supplement-Suppl_File_4.pdf]
