# Supplementary material
Source: PubMed Central journal article supplement (PMC5897187)
Supplement: NIHMS948637-supplement-Suppl_File_1.pdf [file NIHMS948637-supplement-Suppl_File_1.pdf]

Supplementary File 1A

List of samples used in the marker discovery analysis

**SAMPLES USED FOR THE MARKER DISCOVERY**

| Sample_Name | Tissue_type | Donor_type                | Dataset  | Sentrix_ID   | Sentrix_Position | Official_name |
|-------------|-------------|---------------------------|----------|--------------|------------------|---------------|
| C10         | Cell_line   | Colon_Adenocarcinoma_cell | GSE86078 | 3998998097   | R02C02           | C10           |
| C106        | Cell_line   | Colon_Adenocarcinoma_cell | GSE86078 | 9647455219   | R03C02           | C106          |
| C125PM      | Cell_line   | Colon_Adenocarcinoma_cell | GSE86078 | 3999875059   | R06C02           | C125PM        |
| C146        | Cell_line   | Colon_Adenocarcinoma_cell | GSE86078 | 3999876007   | R02C01           | C146          |
| C170        | Cell_line   | Colon_Adenocarcinoma_cell | GSE86078 | 9647455225   | R05C01           | C170          |
| C32         | Cell_line   | Colon_Adenocarcinoma_cell | GSE86078 | 3998426028   | R06C01           | C32           |
| C70         | Cell_line   | Colon_Adenocarcinoma_cell | GSE86078 | 3998426028   | R06C02           | C70           |
| C75         | Cell_line   | Colon_Adenocarcinoma_cell | GSE86078 | 9647450147   | R05C02           | C75           |
| C80         | Cell_line   | Colon_Adenocarcinoma_cell | GSE86078 | 9647455207   | R01C01           | C80           |
| C84         | Cell_line   | Colon_Adenocarcinoma_cell | GSE86078 | 9647455254   | R05C02           | C84           |
| C99         | Cell_line   | Colon_Adenocarcinoma_cell | GSE86078 | 3999002152   | R06C01           | C99           |
| CACO2       | Cell_line   | Colon_Adenocarcinoma_cell | GSE86078 | 3998426003   | R06C01           | CACO-2        |
| CaR1        | Cell_line   | Colon_Adenocarcinoma_cell | GSE86078 | 200486890054 | R06C01           | CAR-1         |
| CCK81       | Cell_line   | Colon_Adenocarcinoma_cell | GSE86078 | 3999002152   | R02C01           | CCK81         |
| CL11        | Cell_line   | Colon_Adenocarcinoma_cell | GSE86078 | 3998426028   | R01C02           | CL-11         |
| CL14        | Cell_line   | Colon_Adenocarcinoma_cell | GSE86078 | 9647455235   | R06C01           | CL-14         |
| CL34        | Cell_line   | Colon_Adenocarcinoma_cell | GSE86078 | 3999875081   | R01C02           | CL-34         |
| CL40        | Cell_line   | Colon_Adenocarcinoma_cell | GSE86078 | 9647455254   | R02C01           | CL-40         |
| Co115       | Cell_line   | Colon_Adenocarcinoma_cell | GSE86078 | 9647455235   | R05C01           | Co-115        |
| COCM1       | Cell_line   | Colon_Adenocarcinoma_cell | GSE86078 | 3999002152   | R04C02           | COCM-1        |
| COGA1       | Cell_line   | Colon_Adenocarcinoma_cell | GSE86078 | 10011071041  | R01C01           | COGA-1        |
| COGA12      | Cell_line   | Colon_Adenocarcinoma_cell | GSE86078 | 9647455255   | R06C01           | COGA-12       |
| COGA2       | Cell_line   | Colon_Adenocarcinoma_cell | GSE86078 | 10011071041  | R02C02           | COGA-2        |
| COGA3       | Cell_line   | Colon_Adenocarcinoma_cell | GSE86078 | 10011071041  | R03C02           | COGA-3        |
| COGA5       | Cell_line   | Colon_Adenocarcinoma_cell | GSE86078 | 3999875059   | R01C01           | COGA-5        |
| COGA5L      | Cell_line   | Colon_Adenocarcinoma_cell | GSE86078 | 9647455197   | R01C02           | COGA-5L       |
| COGA8       | Cell_line   | Colon_Adenocarcinoma_cell | GSE86078 | 3999875129   | R03C02           | COGA-8        |
| COLO201     | Cell_line   | Colon_Adenocarcinoma_cell | GSE86078 | 10011071041  | R04C01           | COLO-201      |
| COLO205     | Cell_line   | Colon_Adenocarcinoma_cell | GSE86078 | 200486890054 | R01C02           | COLO-205      |
| COLO320DM   | Cell_line   | Colon_Adenocarcinoma_cell | GSE86078 | 10011071041  | R06C02           | COLO-320DM    |
| COLO320HSR  | Cell_line   | Colon_Adenocarcinoma_cell | GSE86078 | 200486890054 | R02C02           | COLO-320HSR   |
| COLO60H     | Cell_line   | Colon_Adenocarcinoma_cell | GSE86078 | 3999875129   | R06C01           | COLO-60H      |
| COLO678     | Cell_line   | Colon_Adenocarcinoma_cell | GSE86078 | 3998426028   | R01C01           | COLO-678      |
| COLO94H     | Cell_line   | Colon_Adenocarcinoma_cell | GSE86078 | 9647455197   | R01C01           | COLO-94H      |
| CX1         | Cell_line   | Colon_Adenocarcinoma_cell | GSE86078 | 3999875081   | R03C01           | CX1           |
| DiFi        | Cell_line   | Colon_Adenocarcinoma_cell | GSE86078 | 10011071041  | R05C02           | DiFi          |
| DLD1        | Cell_line   | Colon_Adenocarcinoma_cell | GSE86078 | 200486890054 | R03C02           | DLD1          |
| FET         | Cell_line   | Colon_Adenocarcinoma_cell | GSE86078 | 3999002152   | R05C02           | FET           |
| GEO         | Cell_line   | Colon_Adenocarcinoma_cell | GSE86078 | 9647455251   | R04C01           | GEO           |
| GP2d        | Cell_line   | Colon_Adenocarcinoma_cell | GSE86078 | 9647455255   | R05C02           | GP2d          |
| Gp5D        | Cell_line   | Colon_Adenocarcinoma_cell | GSE86078 | 200693590020 | R01C01           | Gp5d          |
| HCA24       | Cell_line   | Colon_Adenocarcinoma_cell | GSE86078 | 9647455172   | R02C01           | HCA24         |
| HCA46       | Cell_line   | Colon_Adenocarcinoma_cell | GSE86078 | 3998998097   | R02C01           | HCA46         |
| HCA7        | Cell_line   | Colon_Adenocarcinoma_cell | GSE86078 | 9647455255   | R04C02           | HCA7          |
| HCC2998     | Cell_line   | Colon_Adenocarcinoma_cell | GSE86078 | 3998426003   | R05C02           | HCC2998       |
| HCT116      | Cell_line   | Colon_Adenocarcinoma_cell | GSE86078 | 200486890054 | R04C02           | HCT-116       |
| HCT15       | Cell_line   | Colon_Adenocarcinoma_cell | GSE86078 | 200486890054 | R05C02           | HCT-15        |
| HCT8        | Cell_line   | Colon_Adenocarcinoma_cell | GSE86078 | 10011071041  | R06C01           | HCT-8         |
| HDC114      | Cell_line   | Colon_Adenocarcinoma_cell | GSE86078 | 9647455164   | R05C01           | HDC114        |
| HDC135      | Cell_line   | Colon_Adenocarcinoma_cell | GSE86078 | 9647455255   | R03C01           | HDC135        |
| HDC142      | Cell_line   | Colon_Adenocarcinoma_cell | GSE86078 | 10006823050  | R02C01           | HDC142        |
| HDC143      | Cell_line   | Colon_Adenocarcinoma_cell | GSE86078 | 3999875089   | R06C01           | HDC143        |
| HDC54       | Cell_line   | Colon_Adenocarcinoma_cell | GSE86078 | 9647455235   | R03C02           | HDC54         |
| HDC8        | Cell_line   | Colon_Adenocarcinoma_cell | GSE86078 | 9647455199   | R03C01           | HDC8          |
| HDC82       | Cell_line   | Colon_Adenocarcinoma_cell | GSE86078 | 9647455172   | R06C02           | HDC82         |
| HDC9        | Cell_line   | Colon_Adenocarcinoma_cell | GSE86078 | 9647455199   | R02C01           | HDC9          |
| HRA16       | Cell_line   | Colon_Adenocarcinoma_cell | GSE86078 | 9647450147   | R06C02           | HRA16         |
| HROC18      | Cell_line   | Colon_Adenocarcinoma_cell | GSE86078 | 10006823050  | R04C02           | HROC18        |
| HROC24      | Cell_line   | Colon_Adenocarcinoma_cell | GSE86078 | 9647455172   | R02C02           | HROC24        |
| HROC32      | Cell_line   | Colon_Adenocarcinoma_cell | GSE86078 | 3998998097   | R05C02           | HROC32        |
| HROC39      | Cell_line   | Colon_Adenocarcinoma_cell | GSE86078 | 9647455255   | R02C01           | HROC39        |
| HROC46      | Cell_line   | Colon_Adenocarcinoma_cell | GSE86078 | 9647455235   | R01C01           | HROC46        |
| HROC69      | Cell_line   | Colon_Adenocarcinoma_cell | GSE86078 | 9647455251   | R04C02           | HROC69        |
| HROC80      | Cell_line   | Colon_Adenocarcinoma_cell | GSE86078 | 9647455219   | R06C01           | HROC80        |
| HROC87      | Cell_line   | Colon_Adenocarcinoma_cell | GSE86078 | 9647450134   | R05C01           | HROC87        |
| HT115       | Cell_line   | Colon_Adenocarcinoma_cell | GSE86078 | 200486890054 | R06C02           | HT-115        |
| HT29        | Cell_line   | Colon_Adenocarcinoma_cell | GSE86078 | 200693590019 | R01C01           | HT-29         |
| HT55        | Cell_line   | Colon_Adenocarcinoma_cell | GSE86078 | 200693590020 | R02C01           | HT-55         |
| HUTU80      | Cell_line   | Colon_Adenocarcinoma_cell | GSE86078 | 200693590019 | R02C01           | HuTu80        |
| KM12        | Cell_line   | Colon_Adenocarcinoma_cell | GSE86078 | 200693590020 | R03C01           | KM-12         |
| KM12C       | Cell_line   | Colon_Adenocarcinoma_cell | GSE86078 | 9647455172   | R03C01           | KM-12C        |
| KM12SM      | Cell_line   | Colon_Adenocarcinoma_cell | GSE86078 | 3999875089   | R05C01           | KM-12SM       |
| KM20        | Cell_line   | Colon_Adenocarcinoma_cell | GSE86078 | 3999875081   | R06C01           | KM-20         |
| LIM1215     | Cell_line   | Colon_Adenocarcinoma_cell | GSE86078 | 10011071041  | R02C01           | LIM-1215      |
| LIM1899     | Cell_line   | Colon_Adenocarcinoma_cell | GSE86078 | 9647450134   | R04C01           | LIM-1899      |
| LIM2099     | Cell_line   | Colon_Adenocarcinoma_cell | GSE86078 | 3998998097   | R06C01           | LIM-2099      |
| LIM2405     | Cell_line   | Colon_Adenocarcinoma_cell | GSE86078 | 9647455199   | R02C02           | LIM-2405      |
| LIM2412     | Cell_line   | Colon_Adenocarcinoma_cell | GSE86078 | 9647450134   | R02C01           | LIM-2412      |
| LIM2537     | Cell_line   | Colon_Adenocarcinoma_cell | GSE86078 | 9647455251   | R05C02           | LIM-2537      |
| LIM2550     | Cell_line   | Colon_Adenocarcinoma_cell | GSE86078 | 9647455172   | R05C02           | LIM-2550      |
| LIM2551     | Cell_line   | Colon_Adenocarcinoma_cell | GSE86078 | 9647455172   | R01C01           | LIM-2551      |
| LoVo        | Cell_line   | Colon_Adenocarcinoma_cell | GSE86078 | 3998426003   | R03C02           | LoVo          |
| LS1034      | Cell_line   | Colon_Adenocarcinoma_cell | GSE86078 | 3998426003   | R06C02           | LS1034        |
| LS123       | Cell_line   | Colon_Adenocarcinoma_cell | GSE86078 | 200693590020 | R04C01           | LS123         |
| LS174T      | Cell_line   | Colon_Adenocarcinoma_cell | GSE86078 | 3998998097   | R06C02           | LS174T        |
| LS180       | Cell_line   | Colon_Adenocarcinoma_cell | GSE86078 | 200693590019 | R03C01           | LS180         |
| LS411N      | Cell_line   | Colon_Adenocarcinoma_cell | GSE86078 | 3998426003   | R03C01           | LS411N        |
| LS513       | Cell_line   | Colon_Adenocarcinoma_cell | GSE86078 | 200693590020 | R02C02           | LS513         |
| MDST8       | Cell_line   | Colon_Adenocarcinoma_cell | GSE86078 | 200693590019 | R04C01           | MDST8         |
| MIP101      | Cell_line   | Colon_Adenocarcinoma_cell | GSE86078 | 10006823050  | R01C02           | MIP101        |
| NCIH498     | Cell_line   | Colon_Adenocarcinoma_cell | GSE86078 | 3999875081   | R04C01           | NCI-H498      |
| NCIH508     | Cell_line   | Colon_Adenocarcinoma_cell | GSE86078 | 10006823050  | R05C01           | NCI-H508      |

|         |           |                           |          |              |        |          |
|---------|-----------|---------------------------|----------|--------------|--------|----------|
| NCIH630 | Cell_line | Colon_Adenocarcinoma_cell | GSE86078 | 200693590020 | R05C01 | NCI-H630 |
| NCIH684 | Cell_line | Colon_Adenocarcinoma_cell | GSE86078 | 9647455255   | R01C02 | NCI-H684 |
| NCIH716 | Cell_line | Colon_Adenocarcinoma_cell | GSE86078 | 200693590019 | R05C01 | NCI-H716 |
| NCIH747 | Cell_line | Colon_Adenocarcinoma_cell | GSE86078 | 200693590019 | R06C01 | NCI-H747 |
| OUMS23  | Cell_line | Colon_Adenocarcinoma_cell | GSE86078 | 9647455199   | R01C01 | OUMS-23  |
| OXCO1   | Cell_line | Colon_Adenocarcinoma_cell | GSE86078 | 9647455235   | R01C02 | OXCO1    |
| OXCO2   | Cell_line | Colon_Adenocarcinoma_cell | GSE86078 | 10006823050  | R03C02 | OXCO2    |
| OXCO3   | Cell_line | Colon_Adenocarcinoma_cell | GSE86078 | 3998975118   | R03C01 | OXCO3    |
| RCM1    | Cell_line | Colon_Adenocarcinoma_cell | GSE86078 | 200693590019 | R01C02 | RCM1     |
| RKO     | Cell_line | Colon_Adenocarcinoma_cell | GSE86078 | 3998426003   | R01C01 | RKO      |
| RW7213  | Cell_line | Colon_Adenocarcinoma_cell | GSE86078 | 9647455123   | R04C01 | RW7213   |
| SKCO1   | Cell_line | Colon_Adenocarcinoma_cell | GSE86078 | 3998426028   | R02C02 | SKCO-1   |
| SNU1033 | Cell_line | Colon_Adenocarcinoma_cell | GSE86078 | 9647455172   | R01C02 | SNU-1033 |
| SNU1040 | Cell_line | Colon_Adenocarcinoma_cell | GSE86078 | 3998426028   | R04C02 | SNU-1040 |
| SNU1047 | Cell_line | Colon_Adenocarcinoma_cell | GSE86078 | 3998426028   | R02C01 | SNU-1047 |
| SNU1181 | Cell_line | Colon_Adenocarcinoma_cell | GSE86078 | 3998975118   | R04C01 | SNU-1181 |
| SNU1235 | Cell_line | Colon_Adenocarcinoma_cell | GSE86078 | 9647450147   | R04C01 | SNU-1235 |
| SNU1406 | Cell_line | Colon_Adenocarcinoma_cell | GSE86078 | 10006823050  | R04C01 | SNU-1406 |
| SNU1411 | Cell_line | Colon_Adenocarcinoma_cell | GSE86078 | 9647450147   | R05C01 | SNU-1411 |
| SNU1460 | Cell_line | Colon_Adenocarcinoma_cell | GSE86078 | 10006823050  | R06C02 | SNU-1460 |
| SNU1544 | Cell_line | Colon_Adenocarcinoma_cell | GSE86078 | 10006823050  | R06C01 | SNU-1544 |
| SNU1684 | Cell_line | Colon_Adenocarcinoma_cell | GSE86078 | 9647455225   | R04C01 | SNU-1684 |
| SNU1746 | Cell_line | Colon_Adenocarcinoma_cell | GSE86078 | 9647455225   | R03C02 | SNU-1746 |
| SNU175  | Cell_line | Colon_Adenocarcinoma_cell | GSE86078 | 3998426028   | R05C02 | SNU-175  |
| SNU254  | Cell_line | Colon_Adenocarcinoma_cell | GSE86078 | 9647455254   | R03C02 | SNU-254  |
| SNU283  | Cell_line | Colon_Adenocarcinoma_cell | GSE86078 | 3998426003   | R04C01 | SNU-283  |
| SNU407  | Cell_line | Colon_Adenocarcinoma_cell | GSE86078 | 3998426003   | R01C02 | SNU-407  |
| SNU479  | Cell_line | Colon_Adenocarcinoma_cell | GSE86078 | 9647455123   | R04C02 | SNU-479  |
| SNU503  | Cell_line | Colon_Adenocarcinoma_cell | GSE86078 | 3998975089   | R02C02 | SNU-503  |
| SNU61   | Cell_line | Colon_Adenocarcinoma_cell | GSE86078 | 3998426003   | R02C01 | SNU-61   |
| SNU769B | Cell_line | Colon_Adenocarcinoma_cell | GSE86078 | 3998989097   | R03C01 | SNU-769B |
| SNU81   | Cell_line | Colon_Adenocarcinoma_cell | GSE86078 | 9647455164   | R01C01 | SNU-81   |
| SNU977  | Cell_line | Colon_Adenocarcinoma_cell | GSE86078 | 3998989097   | R03C02 | SNU-977  |
| SNUC1   | Cell_line | Colon_Adenocarcinoma_cell | GSE86078 | 3998426003   | R05C01 | SNU-C1   |
| SNUC2A  | Cell_line | Colon_Adenocarcinoma_cell | GSE86078 | 9647455164   | R01C02 | SNU-C2A  |
| SNUC2B  | Cell_line | Colon_Adenocarcinoma_cell | GSE86078 | 200693590019 | R02C02 | SNU-C2B  |
| SNUC4   | Cell_line | Colon_Adenocarcinoma_cell | GSE86078 | 3998976007   | R04C01 | SNU-C4   |
| SNUC5   | Cell_line | Colon_Adenocarcinoma_cell | GSE86078 | 3998426003   | R02C02 | SNU-C5   |
| SW1116  | Cell_line | Colon_Adenocarcinoma_cell | GSE86078 | 200693590019 | R03C02 | SW1116   |
| SW1222  | Cell_line | Colon_Adenocarcinoma_cell | GSE86078 | 9647450134   | R06C01 | SW1222   |
| SW1417  | Cell_line | Colon_Adenocarcinoma_cell | GSE86078 | 3998426028   | R05C01 | SW1417   |
| SW1463  | Cell_line | Colon_Adenocarcinoma_cell | GSE86078 | 200693590019 | R04C02 | SW1463   |
| SW403   | Cell_line | Colon_Adenocarcinoma_cell | GSE86078 | 10006823050  | R03C01 | SW403    |
| SW48    | Cell_line | Colon_Adenocarcinoma_cell | GSE86078 | 6042324140   | R02C01 | SW48     |
| SW480   | Cell_line | Colon_Adenocarcinoma_cell | GSE86078 | 200693590019 | R05C02 | SW480    |
| SW620   | Cell_line | Colon_Adenocarcinoma_cell | GSE86078 | 200693590019 | R06C02 | SW620    |
| SW837   | Cell_line | Colon_Adenocarcinoma_cell | GSE86078 | 3998426003   | R04C02 | SW-837   |
| SW948   | Cell_line | Colon_Adenocarcinoma_cell | GSE86078 | 200693590020 | R06C01 | SW-948   |
| T84     | Cell_line | Colon_Adenocarcinoma_cell | GSE86078 | 200693590020 | R01C02 | T84      |
| V411    | Cell_line | Colon_Adenocarcinoma_cell | GSE86078 | 9647455207   | R03C02 | V411     |
| V457    | Cell_line | Colon_Adenocarcinoma_cell | GSE86078 | 3999002152   | R03C02 | V457     |
| V481    | Cell_line | Colon_Adenocarcinoma_cell | GSE86078 | 9647455251   | R02C01 | V481     |
| V703    | Cell_line | Colon_Adenocarcinoma_cell | GSE86078 | 3999002152   | R04C01 | V703     |
| VACO432 | Cell_line | Colon_Adenocarcinoma_cell | GSE86078 | 3998426028   | R03C01 | VACO-432 |
| VACO5   | Cell_line | Colon_Adenocarcinoma_cell | GSE86078 | 3998975081   | R06C02 | VACO-5   |
| VACO6   | Cell_line | Colon_Adenocarcinoma_cell | GSE86078 | 9647455255   | R01C01 | VACO-6   |
| WiDR    | Cell_line | Colon_Adenocarcinoma_cell | GSE86078 | 3998426028   | R04C01 | WiDR     |

## PUBLICALLY AVAILABLE DATA USED IN THE STUDY

| Sample_Name | Tissue_type   | Donor_type      | Dataset  | Sentrix_ID | Sentrix_Position |
|-------------|---------------|-----------------|----------|------------|------------------|
| GSM796576   | Normal_mucosa | Healthy         | GSE32146 |            |                  |
| GSM796577   | Normal_mucosa | Healthy         | GSE32146 |            |                  |
| GSM796578   | Normal_mucosa | Healthy         | GSE32146 |            |                  |
| GSM796579   | Normal_mucosa | Healthy         | GSE32146 |            |                  |
| GSM796580   | Normal_mucosa | Healthy         | GSE32146 |            |                  |
| GSM796581   | Normal_mucosa | Healthy         | GSE32146 |            |                  |
| GSM796582   | Normal_mucosa | Healthy         | GSE32146 |            |                  |
| GSM796583   | Normal_mucosa | Healthy         | GSE32146 |            |                  |
| GSM796584   | Normal_mucosa | Healthy         | GSE32146 |            |                  |
| GSM796585   | Normal_mucosa | Healthy         | GSE32146 |            |                  |
| GSM796586   | Normal_mucosa | Crohn's_disease | GSE32146 |            |                  |
| GSM796587   | Normal_mucosa | Crohn's_disease | GSE32146 |            |                  |
| GSM796588   | Normal_mucosa | Crohn's_disease | GSE32146 |            |                  |
| GSM796589   | Normal_mucosa | Crohn's_disease | GSE32146 |            |                  |
| GSM796590   | Normal_mucosa | Crohn's_disease | GSE32146 |            |                  |
| GSM796591   | Normal_mucosa | Crohn's_disease | GSE32146 |            |                  |
| GSM796592   | Normal_mucosa | Crohn's_disease | GSE32146 |            |                  |
| GSM796593   | Normal_mucosa | Crohn's_disease | GSE32146 |            |                  |
| GSM796594   | Normal_mucosa | Crohn's_disease | GSE32146 |            |                  |
| GSM796598   | Normal_mucosa | Crohn's_disease | GSE32146 |            |                  |
| GSM1009660  | Whole_Blood   | Healthy_Blood   | GSE41169 |            |                  |
| GSM1009666  | Whole_Blood   | Healthy_Blood   | GSE41169 |            |                  |
| GSM1009667  | Whole_Blood   | Healthy_Blood   | GSE41169 |            |                  |
| GSM1009668  | Whole_Blood   | Healthy_Blood   | GSE41169 |            |                  |
| GSM1009673  | Whole_Blood   | Healthy_Blood   | GSE41169 |            |                  |
| GSM1009674  | Whole_Blood   | Healthy_Blood   | GSE41169 |            |                  |
| GSM1009677  | Whole_Blood   | Healthy_Blood   | GSE41169 |            |                  |
| GSM1009681  | Whole_Blood   | Healthy_Blood   | GSE41169 |            |                  |
| GSM1009685  | Whole_Blood   | Healthy_Blood   | GSE41169 |            |                  |
| GSM1009686  | Whole_Blood   | Healthy_Blood   | GSE41169 |            |                  |
| GSM1009687  | Whole_Blood   | Healthy_Blood   | GSE41169 |            |                  |
| GSM1009688  | Whole_Blood   | Healthy_Blood   | GSE41169 |            |                  |
| GSM1009689  | Whole_Blood   | Healthy_Blood   | GSE41169 |            |                  |
| GSM1009690  | Whole_Blood   | Healthy_Blood   | GSE41169 |            |                  |



|                   |               |                                     |             |            |        |
|-------------------|---------------|-------------------------------------|-------------|------------|--------|
| TCGA-AA-3494-11   | Normal_mucosa | Colon_Adenocarcinoma_norm           | TCGA COREAD | 5775041065 | R02C02 |
| TCGA-AA-3495-11   | Normal_mucosa | Colon_Adenocarcinoma_norm           | TCGA COREAD | 5775041088 | R02C02 |
| TCGA-AA-3502-11   | Normal_mucosa | Colon_Adenocarcinoma_norm           | TCGA COREAD | 5775041065 | R04C02 |
| TCGA-AA-3506-11   | Normal_mucosa | Colon_Adenocarcinoma_norm           | TCGA COREAD | 5775041007 | R01C02 |
| TCGA-AA-3509-11   | Normal_mucosa | Colon_Adenocarcinoma_norm           | TCGA COREAD | 5775041084 | R06C02 |
| TCGA-AA-3510-11   | Normal_mucosa | Colon_Adenocarcinoma_norm           | TCGA COREAD | 5775041084 | R03C02 |
| TCGA-AA-3655-11   | Normal_mucosa | Colon_Adenocarcinoma_norm           | TCGA COREAD | 6042316015 | R06C02 |
| TCGA-AA-3660-11   | Normal_mucosa | Colon_Adenocarcinoma_norm           | TCGA COREAD | 6042308165 | R05C01 |
| TCGA-AA-3663-11   | Normal_mucosa | Colon_Adenocarcinoma_norm           | TCGA COREAD | 6042316001 | R05C02 |
| TCGA-AA-3697-11   | Normal_mucosa | Colon_Adenocarcinoma_norm           | TCGA COREAD | 6042308165 | R04C02 |
| TCGA-AA-3712-11   | Normal_mucosa | Colon_Adenocarcinoma_norm           | TCGA COREAD | 6042316011 | R03C01 |
| TCGA-AA-3713-11   | Normal_mucosa | Colon_Adenocarcinoma_norm           | TCGA COREAD | 6042308165 | R04C01 |
| TCGA-AG-3725-11   | Normal_mucosa | Rectal_Adenocarcinoma_norm          | TCGA COREAD | 6055424097 | R02C02 |
| TCGA-AG-3731-11   | Normal_mucosa | Rectal_Adenocarcinoma_norm          | TCGA COREAD | 6055424075 | R04C01 |
| TCGA-AG-A01W-11   | Normal_mucosa | Rectal_Adenocarcinoma_norm          | TCGA COREAD | 5775041086 | R02C01 |
| TCGA-AG-A01Y-11   | Normal_mucosa | Rectal_Adenocarcinoma_norm          | TCGA COREAD | 5775041086 | R05C01 |
| TCGA-AG-A020-11   | Normal_mucosa | Rectal_Mucinous_Adenocarcinoma_norm | TCGA COREAD | 5775041086 | R01C02 |
| TCGA-AG-A02N-11   | Normal_mucosa | Rectal_Adenocarcinoma_norm          | TCGA COREAD | 5775041086 | R04C02 |
| TCGA-AG-A036-11   | Normal_mucosa | Rectal_Adenocarcinoma_norm          | TCGA COREAD | 5775041086 | R06C02 |
| TCGA-AZ-6598-11   | Normal_mucosa | Colon_Adenocarcinoma_norm           | TCGA COREAD | 6057825035 | R06C02 |
| TCGA-AZ-6599-11   | Normal_mucosa | Colon_Adenocarcinoma_norm           | TCGA COREAD | 6057825028 | R03C02 |
| TCGA-AZ-6600-11   | Normal_mucosa | Colon_Adenocarcinoma_norm           | TCGA COREAD | 6057825020 | R04C01 |
| TCGA-AZ-6601-11   | Normal_mucosa | Colon_Adenocarcinoma_norm           | TCGA COREAD | 6057825002 | R01C02 |
| TCGA-G4-6295-11   | Normal_mucosa | Colon_Adenocarcinoma_norm           | TCGA COREAD | 6042308165 | R06C02 |
| TCGA-G4-6297-11   | Normal_mucosa | Colon_Adenocarcinoma_norm           | TCGA COREAD | 6042316015 | R05C02 |
| TCGA-G4-6298-11   | Normal_mucosa | Colon_Adenocarcinoma_norm           | TCGA COREAD | 6042308159 | R02C01 |
| TCGA-G4-6302-11   | Normal_mucosa | Colon_Mucinous_Adenocarcinoma_norm  | TCGA COREAD | 6042316001 | R02C01 |
| TCGA-G4-6311-11   | Normal_mucosa | Colon_Adenocarcinoma_norm           | TCGA COREAD | 6042308159 | R02C02 |
| TCGA-G4-6314-11   | Normal_mucosa | Colon_Adenocarcinoma_norm           | TCGA COREAD | 6042316015 | R01C02 |
| TCGA-G4-6320-11   | Normal_mucosa | Colon_Adenocarcinoma_norm           | TCGA COREAD | 6042308165 | R02C01 |
| TCGA-G4-6322-11   | Normal_mucosa | Colon_Mucinous_Adenocarcinoma_norm  | TCGA COREAD | 6042308159 | R01C01 |
| TCGA-G4-6625-11   | Normal_mucosa | Colon_Adenocarcinoma_norm           | TCGA COREAD | 6057825028 | R04C02 |
| TCGA-3L-AA1B-01   | Tumor         | Colon_Adenocarcinoma                | TCGA COREAD | 9702496157 | R02C02 |
| TCGA-4N-A93T-01   | Tumor         | Colon_Adenocarcinoma                | TCGA COREAD | 9702496157 | R06C01 |
| TCGA-4T-AA8H-01   | Tumor         | Colon_Mucinous_Adenocarcinoma       | TCGA COREAD | 3999492120 | R06C01 |
| TCGA-5M-AAT4-01   | Tumor         | Colon_Adenocarcinoma                | TCGA COREAD | 3999492115 | R06C02 |
| TCGA-5M-AAT5-01   | Tumor         | NA                                  | TCGA COREAD | 3999492120 | R05C01 |
| TCGA-5M-AAT6-01   | Tumor         | Colon_Adenocarcinoma                | TCGA COREAD | 3999492120 | R02C02 |
| TCGA-5M-AATA-01   | Tumor         | NA                                  | TCGA COREAD | 3999492115 | R05C02 |
| TCGA-5M-AATE-01   | Tumor         | Colon_Adenocarcinoma                | TCGA COREAD | 3999492120 | R06C02 |
| TCGA-A6-2671-01   | Tumor         | Colon_Adenocarcinoma                | TCGA COREAD | 5775041065 | R01C02 |
| TCGA-A6-2675-01   | Tumor         | Colon_Adenocarcinoma                | TCGA COREAD | 6042316015 | R04C01 |
| TCGA-A6-2677-01   | Tumor         | Colon_Adenocarcinoma                | TCGA COREAD | 9305216012 | R01C02 |
| TCGA-A6-2677-01-2 | Tumor         | Colon_Adenocarcinoma                | TCGA COREAD | 9305216012 | R02C02 |
| TCGA-A6-2679-01   | Tumor         | Colon_Adenocarcinoma                | TCGA COREAD | 5775041065 | R04C01 |
| TCGA-A6-2680-01   | Tumor         | Colon_Adenocarcinoma                | TCGA COREAD | 5775041084 | R01C01 |
| TCGA-A6-2681-01   | Tumor         | Colon_Adenocarcinoma                | TCGA COREAD | 5775041088 | R03C02 |
| TCGA-A6-2682-01   | Tumor         | Colon_Adenocarcinoma                | TCGA COREAD | 5775041084 | R06C01 |
| TCGA-A6-2684-01   | Tumor         | Colon_Adenocarcinoma                | TCGA COREAD | 5775041007 | R02C01 |
| TCGA-A6-2684-01-2 | Tumor         | Colon_Adenocarcinoma                | TCGA COREAD | 9305216012 | R03C02 |
| TCGA-A6-2684-01-3 | Tumor         | Colon_Adenocarcinoma                | TCGA COREAD | 9305216012 | R04C02 |
| TCGA-A6-2685-01   | Tumor         | Colon_Adenocarcinoma                | TCGA COREAD | 5775041088 | R06C01 |
| TCGA-A6-2686-01   | Tumor         | Colon_Adenocarcinoma                | TCGA COREAD | 5775041007 | R04C01 |
| TCGA-A6-3809-01   | Tumor         | Colon_Mucinous_Adenocarcinoma       | TCGA COREAD | 9305216012 | R05C02 |
| TCGA-A6-3809-01-2 | Tumor         | Colon_Mucinous_Adenocarcinoma       | TCGA COREAD | 9305216012 | R06C02 |
| TCGA-A6-3810-01   | Tumor         | Colon_Adenocarcinoma                | TCGA COREAD | 9305216015 | R01C01 |
| TCGA-A6-3810-01-2 | Tumor         | Colon_Adenocarcinoma                | TCGA COREAD | 9305216015 | R02C01 |
| TCGA-A6-4105-01   | Tumor         | Colon_Adenocarcinoma                | TCGA COREAD | 6057825020 | R03C02 |
| TCGA-A6-4107-01   | Tumor         | Colon_Adenocarcinoma                | TCGA COREAD | 5775041065 | R01C01 |
| TCGA-A6-5656-01   | Tumor         | Colon_Adenocarcinoma                | TCGA COREAD | 6929718065 | R06C01 |
| TCGA-A6-5656-01-2 | Tumor         | Colon_Adenocarcinoma                | TCGA COREAD | 9305216015 | R03C01 |
| TCGA-A6-5656-01-3 | Tumor         | Colon_Adenocarcinoma                | TCGA COREAD | 9305216015 | R04C01 |
| TCGA-A6-5657-01   | Tumor         | Colon_Adenocarcinoma                | TCGA COREAD | 6285625037 | R04C02 |
| TCGA-A6-5659-01   | Tumor         | Colon_Adenocarcinoma                | TCGA COREAD | 6285625037 | R01C01 |
| TCGA-A6-5659-01-2 | Tumor         | Colon_Adenocarcinoma                | TCGA COREAD | 9305216015 | R05C01 |
| TCGA-A6-5659-01-3 | Tumor         | Colon_Adenocarcinoma                | TCGA COREAD | 9305216015 | R06C01 |
| TCGA-A6-5660-01   | Tumor         | Colon_Adenocarcinoma                | TCGA COREAD | 6285625037 | R01C02 |
| TCGA-A6-5661-01   | Tumor         | Colon_Adenocarcinoma                | TCGA COREAD | 6285625011 | R06C01 |
| TCGA-A6-5661-01-2 | Tumor         | Colon_Adenocarcinoma                | TCGA COREAD | 7796806109 | R05C02 |
| TCGA-A6-5662-01   | Tumor         | Colon_Adenocarcinoma                | TCGA COREAD | 6285625011 | R01C01 |
| TCGA-A6-5664-01   | Tumor         | Colon_Adenocarcinoma                | TCGA COREAD | 6929718079 | R04C02 |
| TCGA-A6-5665-01   | Tumor         | Colon_Adenocarcinoma                | TCGA COREAD | 6285625057 | R02C02 |
| TCGA-A6-5665-01-2 | Tumor         | Colon_Adenocarcinoma                | TCGA COREAD | 7796806109 | R03C02 |
| TCGA-A6-5666-01   | Tumor         | Colon_Adenocarcinoma                | TCGA COREAD | 6285625057 | R01C02 |
| TCGA-A6-5667-01   | Tumor         | Colon_Adenocarcinoma                | TCGA COREAD | 6042316015 | R03C02 |
| TCGA-A6-6137-01   | Tumor         | Colon_Adenocarcinoma                | TCGA COREAD | 6057825028 | R01C01 |
| TCGA-A6-6138-01   | Tumor         | Colon_Adenocarcinoma                | TCGA COREAD | 6057825020 | R01C02 |
| TCGA-A6-6140-01   | Tumor         | Colon_Adenocarcinoma                | TCGA COREAD | 6057825002 | R03C02 |
| TCGA-A6-6141-01   | Tumor         | Colon_Adenocarcinoma                | TCGA COREAD | 6057825020 | R02C01 |
| TCGA-A6-6142-01   | Tumor         | Colon_Adenocarcinoma                | TCGA COREAD | 6057825028 | R01C02 |
| TCGA-A6-6648-01   | Tumor         | Colon_Adenocarcinoma                | TCGA COREAD | 6057825020 | R03C01 |
| TCGA-A6-6649-01   | Tumor         | Colon_Adenocarcinoma                | TCGA COREAD | 6057825020 | R06C02 |
| TCGA-A6-6650-01   | Tumor         | Colon_Adenocarcinoma                | TCGA COREAD | 6057825028 | R05C02 |
| TCGA-A6-6650-01-2 | Tumor         | Colon_Adenocarcinoma                | TCGA COREAD | 9305216015 | R01C02 |
| TCGA-A6-6650-01-3 | Tumor         | Colon_Adenocarcinoma                | TCGA COREAD | 9305216015 | R02C02 |
| TCGA-A6-6651-01   | Tumor         | Colon_Adenocarcinoma                | TCGA COREAD | 6929718053 | R05C01 |
| TCGA-A6-6652-01   | Tumor         | Colon_Adenocarcinoma                | TCGA COREAD | 6057825028 | R06C01 |
| TCGA-A6-6653-01   | Tumor         | Colon_Adenocarcinoma                | TCGA COREAD | 6057825028 | R06C02 |
| TCGA-A6-6654-01   | Tumor         | Colon_Adenocarcinoma                | TCGA COREAD | 6929718065 | R02C01 |
| TCGA-A6-6780-01   | Tumor         | Colon_Mucinous_Adenocarcinoma       | TCGA COREAD | 6929718053 | R04C01 |
| TCGA-A6-6780-01-2 | Tumor         | Colon_Mucinous_Adenocarcinoma       | TCGA COREAD | 9305216015 | R03C02 |
| TCGA-A6-6780-01-3 | Tumor         | Colon_Mucinous_Adenocarcinoma       | TCGA COREAD | 9305216015 | R04C02 |
| TCGA-A6-6781-01   | Tumor         | Colon_Mucinous_Adenocarcinoma       | TCGA COREAD | 6264509018 | R01C01 |
| TCGA-A6-6781-01-2 | Tumor         | Colon_Mucinous_Adenocarcinoma       | TCGA COREAD | 6264509087 | R05C02 |
| TCGA-A6-6781-01-3 | Tumor         | Colon_Mucinous_Adenocarcinoma       | TCGA COREAD | 9305216015 | R05C02 |
| TCGA-A6-6781-01-4 | Tumor         | Colon_Mucinous_Adenocarcinoma       | TCGA COREAD | 9305216015 | R06C02 |
| TCGA-A6-6782-01   | Tumor         | Colon_Adenocarcinoma                | TCGA COREAD | 6929718053 | R03C02 |

|                   |       |                                |             |            |        |
|-------------------|-------|--------------------------------|-------------|------------|--------|
| TCGA-A6-A565-01   | Tumor | Colon_Mucinous_Adenocarcinoma  | TCGA COREAD | 9296931074 | R02C01 |
| TCGA-A6-A566-01   | Tumor | Colon_Mucinous_Adenocarcinoma  | TCGA COREAD | 9296931073 | R05C01 |
| TCGA-A6-A567-01   | Tumor | Colon_Adenocarcinoma           | TCGA COREAD | 9296931074 | R04C01 |
| TCGA-A6-A56B-01   | Tumor | Colon_Adenocarcinoma           | TCGA COREAD | 9296931073 | R04C01 |
| TCGA-A6-A5ZU-01   | Tumor | Colon_Adenocarcinoma           | TCGA COREAD | 9296931073 | R03C02 |
| TCGA-AA-3488-01   | Tumor | Colon_Adenocarcinoma           | TCGA COREAD | 5775041084 | R04C01 |
| TCGA-AA-3489-01   | Tumor | Colon_Adenocarcinoma           | TCGA COREAD | 6929718053 | R06C02 |
| TCGA-AA-3492-01   | Tumor | Colon_Adenocarcinoma           | TCGA COREAD | 5775041065 | R06C01 |
| TCGA-AA-3494-01   | Tumor | Colon_Adenocarcinoma           | TCGA COREAD | 5775041088 | R01C01 |
| TCGA-AA-3495-01   | Tumor | Colon_Adenocarcinoma           | TCGA COREAD | 5775041007 | R01C01 |
| TCGA-AA-3496-01   | Tumor | Colon_Adenocarcinoma           | TCGA COREAD | 6929718065 | R06C02 |
| TCGA-AA-3502-01   | Tumor | Colon_Adenocarcinoma           | TCGA COREAD | 5775041088 | R06C02 |
| TCGA-AA-3506-01   | Tumor | Colon_Adenocarcinoma           | TCGA COREAD | 5775041065 | R03C02 |
| TCGA-AA-3509-01   | Tumor | Colon_Adenocarcinoma           | TCGA COREAD | 5775041088 | R04C02 |
| TCGA-AA-3510-01   | Tumor | Colon_Adenocarcinoma           | TCGA COREAD | 5775041065 | R02C01 |
| TCGA-AA-3511-01   | Tumor | Colon_Adenocarcinoma           | TCGA COREAD | 6929718065 | R05C01 |
| TCGA-AA-3655-01   | Tumor | Colon_Adenocarcinoma           | TCGA COREAD | 6042308165 | R01C01 |
| TCGA-AA-3660-01   | Tumor | Colon_Adenocarcinoma           | TCGA COREAD | 6042308158 | R06C02 |
| TCGA-AA-3662-01   | Tumor | Colon_Adenocarcinoma           | TCGA COREAD | 6042308159 | R05C02 |
| TCGA-AA-3663-01   | Tumor | Colon_Adenocarcinoma           | TCGA COREAD | 6042316001 | R04C02 |
| TCGA-AA-3697-01   | Tumor | Colon_Adenocarcinoma           | TCGA COREAD | 6042316015 | R02C02 |
| TCGA-AA-3712-01   | Tumor | Colon_Adenocarcinoma           | TCGA COREAD | 6042308165 | R02C02 |
| TCGA-AA-3713-01   | Tumor | Colon_Adenocarcinoma           | TCGA COREAD | 6042316001 | R01C01 |
| TCGA-AD-5900-01   | Tumor | Colon_Mucinous_Adenocarcinoma  | TCGA COREAD | 6285625011 | R02C02 |
| TCGA-AD-6548-01   | Tumor | Colon_Adenocarcinoma           | TCGA COREAD | 6929718054 | R05C01 |
| TCGA-AD-6888-01   | Tumor | Colon_Adenocarcinoma           | TCGA COREAD | 6264509018 | R05C01 |
| TCGA-AD-6888-01-2 | Tumor | Colon_Adenocarcinoma           | TCGA COREAD | 6264509087 | R03C02 |
| TCGA-AD-6889-01   | Tumor | Colon_Adenocarcinoma           | TCGA COREAD | 6264509018 | R03C02 |
| TCGA-AD-6889-01-2 | Tumor | Colon_Adenocarcinoma           | TCGA COREAD | 6264509087 | R04C02 |
| TCGA-AD-6890-01   | Tumor | Colon_Adenocarcinoma           | TCGA COREAD | 6264509018 | R02C02 |
| TCGA-AD-6890-01-2 | Tumor | Colon_Adenocarcinoma           | TCGA COREAD | 6264509087 | R01C01 |
| TCGA-AD-6895-01   | Tumor | Colon_Adenocarcinoma           | TCGA COREAD | 6264509087 | R05C01 |
| TCGA-AD-6899-01   | Tumor | Colon_Mucinous_Adenocarcinoma  | TCGA COREAD | 6264509087 | R01C02 |
| TCGA-AD-6901-01   | Tumor | Colon_Adenocarcinoma           | TCGA COREAD | 6264496026 | R06C02 |
| TCGA-AD-6963-01   | Tumor | Colon_Adenocarcinoma           | TCGA COREAD | 6264509087 | R03C01 |
| TCGA-AD-6963-01-2 | Tumor | Colon_Adenocarcinoma           | TCGA COREAD | 6264509127 | R03C01 |
| TCGA-AD-6964-01   | Tumor | Colon_Adenocarcinoma           | TCGA COREAD | 6264509018 | R02C01 |
| TCGA-AD-6964-01-2 | Tumor | Colon_Adenocarcinoma           | TCGA COREAD | 6264509087 | R06C02 |
| TCGA-AD-6965-01   | Tumor | Colon_Adenocarcinoma           | TCGA COREAD | 6264509018 | R05C02 |
| TCGA-AD-6965-01-2 | Tumor | Colon_Adenocarcinoma           | TCGA COREAD | 6264509018 | R06C01 |
| TCGA-AD-A5EJ-01   | Tumor | Colon_Adenocarcinoma           | TCGA COREAD | 9296931073 | R06C01 |
| TCGA-AD-A5EK-01   | Tumor | Colon_Adenocarcinoma           | TCGA COREAD | 9296931073 | R02C02 |
| TCGA-AF-2687-01   | Tumor | Rectal_Adenocarcinoma          | TCGA COREAD | 6055424097 | R04C02 |
| TCGA-AF-2690-01   | Tumor | Rectal_Adenocarcinoma          | TCGA COREAD | 6055424097 | R01C02 |
| TCGA-AF-2693-01   | Tumor | NA                             | TCGA COREAD | 6055424075 | R04C02 |
| TCGA-AF-3911-01   | Tumor | Rectal_Adenocarcinoma          | TCGA COREAD | 6055424097 | R05C02 |
| TCGA-AF-4110-01   | Tumor | NA                             | TCGA COREAD | 6055424097 | R04C01 |
| TCGA-AF-6136-01   | Tumor | Rectal_Adenocarcinoma          | TCGA COREAD | 6929718081 | R03C01 |
| TCGA-AF-6655-01   | Tumor | Rectal_Adenocarcinoma          | TCGA COREAD | 6929718081 | R02C01 |
| TCGA-AF-6672-01   | Tumor | Rectal_Adenocarcinoma          | TCGA COREAD | 6929718081 | R06C02 |
| TCGA-AF-A56K-01   | Tumor | Rectal_Adenocarcinoma          | TCGA COREAD | 9828653044 | R03C02 |
| TCGA-AF-A56L-01   | Tumor | Rectal_Adenocarcinoma          | TCGA COREAD | 9828653044 | R04C02 |
| TCGA-AF-A56N-01   | Tumor | Rectal_Adenocarcinoma          | TCGA COREAD | 9828653044 | R05C02 |
| TCGA-AG-3591-01   | Tumor | Rectal_Adenocarcinoma          | TCGA COREAD | 6055424075 | R03C01 |
| TCGA-AG-3592-01   | Tumor | Rectal_Adenocarcinoma          | TCGA COREAD | 6055424075 | R03C02 |
| TCGA-AG-3725-01   | Tumor | Rectal_Adenocarcinoma          | TCGA COREAD | 6055424075 | R01C01 |
| TCGA-AG-3731-01   | Tumor | Rectal_Adenocarcinoma          | TCGA COREAD | 6055424040 | R04C02 |
| TCGA-AG-3732-01   | Tumor | Rectal_Adenocarcinoma          | TCGA COREAD | 6929718058 | R01C01 |
| TCGA-AG-3742-01   | Tumor | Rectal_Adenocarcinoma          | TCGA COREAD | 6929718058 | R02C02 |
| TCGA-AG-4021-01   | Tumor | Rectal_Adenocarcinoma          | TCGA COREAD | 6055424097 | R03C02 |
| TCGA-AG-4022-01   | Tumor | Rectal_Adenocarcinoma          | TCGA COREAD | 6055424097 | R06C02 |
| TCGA-AG-A01W-01   | Tumor | Rectal_Adenocarcinoma          | TCGA COREAD | 5775041086 | R01C01 |
| TCGA-AG-A01Y-01   | Tumor | Rectal_Adenocarcinoma          | TCGA COREAD | 5775041086 | R04C01 |
| TCGA-AG-A020-01   | Tumor | Rectal_Mucinous_Adenocarcinoma | TCGA COREAD | 5775041086 | R06C01 |
| TCGA-AG-A026-01   | Tumor | Rectal_Adenocarcinoma          | TCGA COREAD | 5775041086 | R02C02 |
| TCGA-AG-A02N-01   | Tumor | Rectal_Adenocarcinoma          | TCGA COREAD | 5775041086 | R03C02 |
| TCGA-AG-A036-01   | Tumor | Rectal_Adenocarcinoma          | TCGA COREAD | 5775041086 | R05C02 |
| TCGA-AH-6544-01   | Tumor | Rectal_Adenocarcinoma          | TCGA COREAD | 6929718058 | R06C02 |
| TCGA-AH-6547-01   | Tumor | Rectal_Adenocarcinoma          | TCGA COREAD | 6929718061 | R05C02 |
| TCGA-AH-6549-01   | Tumor | Rectal_Adenocarcinoma          | TCGA COREAD | 6929718081 | R05C01 |
| TCGA-AH-6643-01   | Tumor | Rectal_Adenocarcinoma          | TCGA COREAD | 6929718061 | R06C02 |
| TCGA-AH-6644-01   | Tumor | Rectal_Adenocarcinoma          | TCGA COREAD | 6929718081 | R04C02 |
| TCGA-AH-6897-01   | Tumor | Rectal_Adenocarcinoma          | TCGA COREAD | 6929718114 | R05C01 |
| TCGA-AH-6903-01   | Tumor | Rectal_Mucinous_Adenocarcinoma | TCGA COREAD | 6929718114 | R02C01 |
| TCGA-AM-5820-01   | Tumor | Colon_Adenocarcinoma           | TCGA COREAD | 6285625037 | R03C02 |
| TCGA-AM-5821-01   | Tumor | Colon_Adenocarcinoma           | TCGA COREAD | 6285625037 | R02C01 |
| TCGA-AU-3779-01   | Tumor | Colon_Adenocarcinoma           | TCGA COREAD | 6042316001 | R04C01 |
| TCGA-AU-6004-01   | Tumor | Colon_Adenocarcinoma           | TCGA COREAD | 6042308159 | R01C02 |
| TCGA-AY-5543-01   | Tumor | Colon_Adenocarcinoma           | TCGA COREAD | 6285625037 | R06C02 |
| TCGA-AY-6196-01   | Tumor | Colon_Mucinous_Adenocarcinoma  | TCGA COREAD | 6042308165 | R06C01 |
| TCGA-AY-6197-01   | Tumor | Colon_Adenocarcinoma           | TCGA COREAD | 6042308159 | R06C02 |
| TCGA-AY-6386-01   | Tumor | Colon_Adenocarcinoma           | TCGA COREAD | 6042308165 | R01C02 |
| TCGA-AY-A54L-01   | Tumor | Colon_Adenocarcinoma           | TCGA COREAD | 9296931073 | R01C02 |
| TCGA-AY-A69D-01   | Tumor | Colon_Adenocarcinoma           | TCGA COREAD | 9702496157 | R05C01 |
| TCGA-AY-A71X-01   | Tumor | Colon_Adenocarcinoma           | TCGA COREAD | 9702496157 | R03C02 |
| TCGA-AY-A8YK-01   | Tumor | Colon_Adenocarcinoma           | TCGA COREAD | 399492120  | R03C01 |
| TCGA-AZ-4308-01   | Tumor | Colon_Adenocarcinoma           | TCGA COREAD | 5775041065 | R03C01 |
| TCGA-AZ-4313-01   | Tumor | Colon_Adenocarcinoma           | TCGA COREAD | 5775041065 | R05C02 |
| TCGA-AZ-4315-01   | Tumor | Colon_Adenocarcinoma           | TCGA COREAD | 5775041084 | R02C02 |
| TCGA-AZ-4323-01   | Tumor | Colon_Adenocarcinoma           | TCGA COREAD | 6929718079 | R06C01 |
| TCGA-AZ-4614-01   | Tumor | Colon_Adenocarcinoma           | TCGA COREAD | 5775041084 | R01C02 |
| TCGA-AZ-4615-01   | Tumor | Colon_Adenocarcinoma           | TCGA COREAD | 5775041007 | R03C01 |
| TCGA-AZ-4616-01   | Tumor | Colon_Adenocarcinoma           | TCGA COREAD | 6929718054 | R03C01 |
| TCGA-AZ-4681-01   | Tumor | Colon_Adenocarcinoma           | TCGA COREAD | 5775041088 | R01C02 |
| TCGA-AZ-4682-01   | Tumor | Colon_Adenocarcinoma           | TCGA COREAD | 5775041065 | R05C01 |
| TCGA-AZ-4684-01   | Tumor | Colon_Adenocarcinoma           | TCGA COREAD | 5775041088 | R05C02 |
| TCGA-AZ-5403-01   | Tumor | Colon_Adenocarcinoma           | TCGA COREAD | 6285625057 | R02C01 |
| TCGA-AZ-5407-01   | Tumor | Colon_Adenocarcinoma           | TCGA COREAD | 6042308158 | R04C02 |

|                   |       |                               |             |            |        |
|-------------------|-------|-------------------------------|-------------|------------|--------|
| TCGA-AZ-6598-01   | Tumor | Colon_Adenocarcinoma          | TCGA COREAD | 6057825020 | R04C02 |
| TCGA-AZ-6599-01   | Tumor | Colon_Adenocarcinoma          | TCGA COREAD | 6057825020 | R05C01 |
| TCGA-AZ-6600-01   | Tumor | Colon_Adenocarcinoma          | TCGA COREAD | 6057825020 | R02C02 |
| TCGA-AZ-6601-01   | Tumor | Colon_Adenocarcinoma          | TCGA COREAD | 6057825002 | R05C01 |
| TCGA-AZ-6603-01   | Tumor | Colon_Adenocarcinoma          | TCGA COREAD | 6929718053 | R01C02 |
| TCGA-AZ-6605-01   | Tumor | Colon_Adenocarcinoma          | TCGA COREAD | 6929718054 | R01C02 |
| TCGA-AZ-6606-01   | Tumor | Colon_Adenocarcinoma          | TCGA COREAD | 6929718065 | R01C02 |
| TCGA-AZ-6607-01   | Tumor | Colon_Adenocarcinoma          | TCGA COREAD | 6929718079 | R03C02 |
| TCGA-AZ-6608-01   | Tumor | Colon_Adenocarcinoma          | TCGA COREAD | 6929718065 | R05C02 |
| TCGA-BM-6198-01   | Tumor | Rectal_Adenocarcinoma         | TCGA COREAD | 6055424075 | R01C02 |
| TCGA-CA-5254-01   | Tumor | Colon_Adenocarcinoma          | TCGA COREAD | 6929718065 | R01C01 |
| TCGA-CA-5255-01   | Tumor | Colon_Adenocarcinoma          | TCGA COREAD | 6929718053 | R04C02 |
| TCGA-CA-5256-01   | Tumor | Colon_Adenocarcinoma          | TCGA COREAD | 5775041084 | R05C01 |
| TCGA-CA-5796-01   | Tumor | Colon_Mucinous_Adenocarcinoma | TCGA COREAD | 6285625037 | R05C01 |
| TCGA-CA-5797-01   | Tumor | Colon_Adenocarcinoma          | TCGA COREAD | 6285625057 | R06C01 |
| TCGA-CA-6715-01   | Tumor | Colon_Adenocarcinoma          | TCGA COREAD | 6929718054 | R05C02 |
| TCGA-CA-6716-01   | Tumor | Colon_Adenocarcinoma          | TCGA COREAD | 6929718054 | R02C01 |
| TCGA-CA-6717-01   | Tumor | Colon_Mucinous_Adenocarcinoma | TCGA COREAD | 6929718079 | R05C01 |
| TCGA-CA-6718-01   | Tumor | Colon_Adenocarcinoma          | TCGA COREAD | 6929718054 | R01C01 |
| TCGA-CA-6719-01   | Tumor | Colon_Adenocarcinoma          | TCGA COREAD | 6929718079 | R01C02 |
| TCGA-CI-6619-01   | Tumor | Rectal_Adenocarcinoma         | TCGA COREAD | 6929718081 | R01C01 |
| TCGA-CI-6620-01   | Tumor | Rectal_Adenocarcinoma         | TCGA COREAD | 6929718058 | R03C02 |
| TCGA-CI-6621-01   | Tumor | Rectal_Adenocarcinoma         | TCGA COREAD | 6929718061 | R01C01 |
| TCGA-CI-6622-01   | Tumor | Rectal_Adenocarcinoma         | TCGA COREAD | 6929718061 | R06C01 |
| TCGA-CI-6623-01   | Tumor | Rectal_Adenocarcinoma         | TCGA COREAD | 6929718061 | R01C02 |
| TCGA-CI-6624-01   | Tumor | Rectal_Adenocarcinoma         | TCGA COREAD | 6929718058 | R04C02 |
| TCGA-CK-4947-01   | Tumor | Colon_Adenocarcinoma          | TCGA COREAD | 6285625037 | R04C01 |
| TCGA-CK-4948-01   | Tumor | Colon_Adenocarcinoma          | TCGA COREAD | 6285625068 | R06C01 |
| TCGA-CK-4950-01   | Tumor | Colon_Adenocarcinoma          | TCGA COREAD | 6042308165 | R03C01 |
| TCGA-CK-4951-01   | Tumor | Colon_Mucinous_Adenocarcinoma | TCGA COREAD | 5775041084 | R04C02 |
| TCGA-CK-4952-01   | Tumor | Colon_Mucinous_Adenocarcinoma | TCGA COREAD | 6042308158 | R03C01 |
| TCGA-CK-5912-01   | Tumor | Colon_Adenocarcinoma          | TCGA COREAD | 6285625057 | R01C01 |
| TCGA-CK-5913-01   | Tumor | Colon_Adenocarcinoma          | TCGA COREAD | 6285625057 | R05C01 |
| TCGA-CK-5914-01   | Tumor | Colon_Adenocarcinoma          | TCGA COREAD | 6285625011 | R05C02 |
| TCGA-CK-5915-01   | Tumor | Colon_Adenocarcinoma          | TCGA COREAD | 6285625011 | R01C02 |
| TCGA-CK-5916-01   | Tumor | Colon_Adenocarcinoma          | TCGA COREAD | 6285625037 | R02C02 |
| TCGA-CK-6746-01   | Tumor | Colon_Adenocarcinoma          | TCGA COREAD | 6929718079 | R02C02 |
| TCGA-CK-6747-01   | Tumor | Colon_Adenocarcinoma          | TCGA COREAD | 6929718053 | R03C01 |
| TCGA-CK-6748-01   | Tumor | Colon_Mucinous_Adenocarcinoma | TCGA COREAD | 6929718079 | R04C01 |
| TCGA-CK-6751-01   | Tumor | Colon_Mucinous_Adenocarcinoma | TCGA COREAD | 6929718054 | R06C01 |
| TCGA-CL-4957-01   | Tumor | Rectal_Adenocarcinoma         | TCGA COREAD | 6055424040 | R03C02 |
| TCGA-CL-5917-01   | Tumor | Rectal_Adenocarcinoma         | TCGA COREAD | 6929718042 | R01C02 |
| TCGA-CL-5918-01   | Tumor | Rectal_Adenocarcinoma         | TCGA COREAD | 6929718058 | R05C01 |
| TCGA-CM-4743-01   | Tumor | Colon_Adenocarcinoma          | TCGA COREAD | 6042316001 | R06C02 |
| TCGA-CM-4744-01   | Tumor | Colon_Adenocarcinoma          | TCGA COREAD | 5775041065 | R06C02 |
| TCGA-CM-4746-01   | Tumor | Colon_Adenocarcinoma          | TCGA COREAD | 5775041007 | R05C01 |
| TCGA-CM-4747-01   | Tumor | Colon_Adenocarcinoma          | TCGA COREAD | 5775041088 | R02C01 |
| TCGA-CM-4748-01   | Tumor | Colon_Mucinous_Adenocarcinoma | TCGA COREAD | 5775041084 | R03C01 |
| TCGA-CM-4750-01   | Tumor | Colon_Adenocarcinoma          | TCGA COREAD | 5775041007 | R06C01 |
| TCGA-CM-4751-01   | Tumor | Colon_Adenocarcinoma          | TCGA COREAD | 6929718053 | R02C02 |
| TCGA-CM-4752-01   | Tumor | Colon_Adenocarcinoma          | TCGA COREAD | 5775041088 | R03C01 |
| TCGA-CM-5341-01   | Tumor | Colon_Adenocarcinoma          | TCGA COREAD | 5775041088 | R05C01 |
| TCGA-CM-5344-01   | Tumor | Colon_Adenocarcinoma          | TCGA COREAD | 6042316001 | R06C01 |
| TCGA-CM-5348-01   | Tumor | Colon_Adenocarcinoma          | TCGA COREAD | 6042316015 | R06C01 |
| TCGA-CM-5349-01   | Tumor | Colon_Adenocarcinoma          | TCGA COREAD | 6042316011 | R06C01 |
| TCGA-CM-5860-01   | Tumor | Colon_Adenocarcinoma          | TCGA COREAD | 6285625037 | R05C02 |
| TCGA-CM-5861-01   | Tumor | Colon_Adenocarcinoma          | TCGA COREAD | 6285625011 | R04C01 |
| TCGA-CM-5862-01   | Tumor | Colon_Adenocarcinoma          | TCGA COREAD | 6285625068 | R04C01 |
| TCGA-CM-5863-01   | Tumor | Colon_Mucinous_Adenocarcinoma | TCGA COREAD | 6929718053 | R01C01 |
| TCGA-CM-5864-01   | Tumor | Colon_Adenocarcinoma          | TCGA COREAD | 6285625068 | R05C01 |
| TCGA-CM-5868-01   | Tumor | Colon_Adenocarcinoma          | TCGA COREAD | 6285625057 | R04C01 |
| TCGA-CM-6161-01   | Tumor | Colon_Adenocarcinoma          | TCGA COREAD | 6285625037 | R06C01 |
| TCGA-CM-6162-01   | Tumor | Colon_Mucinous_Adenocarcinoma | TCGA COREAD | 6285625068 | R01C02 |
| TCGA-CM-6163-01   | Tumor | Colon_Adenocarcinoma          | TCGA COREAD | 6929671148 | R03C01 |
| TCGA-CM-6164-01   | Tumor | Colon_Adenocarcinoma          | TCGA COREAD | 6285625068 | R03C01 |
| TCGA-CM-6165-01   | Tumor | Colon_Adenocarcinoma          | TCGA COREAD | 6929671148 | R06C01 |
| TCGA-CM-6166-01   | Tumor | Colon_Adenocarcinoma          | TCGA COREAD | 6285625011 | R05C01 |
| TCGA-CM-6167-01   | Tumor | Colon_Adenocarcinoma          | TCGA COREAD | 6929671148 | R05C01 |
| TCGA-CM-6168-01   | Tumor | Colon_Adenocarcinoma          | TCGA COREAD | 6929671148 | R04C01 |
| TCGA-CM-6169-01   | Tumor | Colon_Adenocarcinoma          | TCGA COREAD | 6285625057 | R04C02 |
| TCGA-CM-6170-01   | Tumor | Colon_Adenocarcinoma          | TCGA COREAD | 6285625057 | R03C01 |
| TCGA-CM-6171-01   | Tumor | Colon_Adenocarcinoma          | TCGA COREAD | 6285625037 | R03C01 |
| TCGA-CM-6172-01   | Tumor | Colon_Adenocarcinoma          | TCGA COREAD | 6285625068 | R01C01 |
| TCGA-CM-6674-01   | Tumor | Colon_Adenocarcinoma          | TCGA COREAD | 6929718054 | R03C02 |
| TCGA-CM-6675-01   | Tumor | Colon_Adenocarcinoma          | TCGA COREAD | 6929718054 | R04C01 |
| TCGA-CM-6676-01   | Tumor | Colon_Adenocarcinoma          | TCGA COREAD | 6929718053 | R02C01 |
| TCGA-CM-6677-01   | Tumor | Colon_Adenocarcinoma          | TCGA COREAD | 6929718065 | R04C01 |
| TCGA-CM-6678-01   | Tumor | Colon_Adenocarcinoma          | TCGA COREAD | 6929718054 | R04C02 |
| TCGA-CM-6679-01   | Tumor | Colon_Adenocarcinoma          | TCGA COREAD | 6929718079 | R05C02 |
| TCGA-CM-6680-01   | Tumor | Colon_Adenocarcinoma          | TCGA COREAD | 6929718054 | R06C02 |
| TCGA-D5-5537-01   | Tumor | Colon_Adenocarcinoma          | TCGA COREAD | 6264509018 | R04C02 |
| TCGA-D5-5537-01-2 | Tumor | Colon_Adenocarcinoma          | TCGA COREAD | 6264509127 | R02C01 |
| TCGA-D5-5538-01   | Tumor | Colon_Adenocarcinoma          | TCGA COREAD | 6929671148 | R02C01 |
| TCGA-D5-5539-01   | Tumor | Colon_Mucinous_Adenocarcinoma | TCGA COREAD | 6285625011 | R04C02 |
| TCGA-D5-5540-01   | Tumor | Colon_Adenocarcinoma          | TCGA COREAD | 6285625011 | R03C01 |
| TCGA-D5-5541-01   | Tumor | Colon_Adenocarcinoma          | TCGA COREAD | 6285625011 | R02C01 |
| TCGA-D5-6529-01   | Tumor | Colon_Adenocarcinoma          | TCGA COREAD | 6057825028 | R04C01 |
| TCGA-D5-6530-01   | Tumor | Colon_Adenocarcinoma          | TCGA COREAD | 6042316011 | R04C01 |
| TCGA-D5-6531-01   | Tumor | Colon_Adenocarcinoma          | TCGA COREAD | 6042308158 | R05C02 |
| TCGA-D5-6532-01   | Tumor | Colon_Adenocarcinoma          | TCGA COREAD | 6042308165 | R03C02 |
| TCGA-D5-6533-01   | Tumor | Colon_Adenocarcinoma          | TCGA COREAD | 6042308158 | R02C01 |
| TCGA-D5-6534-01   | Tumor | Colon_Mucinous_Adenocarcinoma | TCGA COREAD | 6264509087 | R02C01 |
| TCGA-D5-6534-01-2 | Tumor | Colon_Mucinous_Adenocarcinoma | TCGA COREAD | 6264509127 | R05C01 |
| TCGA-D5-6535-01   | Tumor | Colon_Adenocarcinoma          | TCGA COREAD | 6042316011 | R01C01 |
| TCGA-D5-6536-01   | Tumor | Colon_Adenocarcinoma          | TCGA COREAD | 6042308159 | R04C01 |
| TCGA-D5-6537-01   | Tumor | Colon_Adenocarcinoma          | TCGA COREAD | 6042308158 | R03C02 |
| TCGA-D5-6538-01   | Tumor | Colon_Adenocarcinoma          | TCGA COREAD | 6042316015 | R01C01 |
| TCGA-D5-6539-01   | Tumor | Colon_Adenocarcinoma          | TCGA COREAD | 6042316011 | R05C01 |

|                   |       |                                |             |            |        |
|-------------------|-------|--------------------------------|-------------|------------|--------|
| TCGA-D5-6540-01   | Tumor | Colon_Mucinous_Adenocarcinoma  | TCGA COREAD | 6042316001 | R01C02 |
| TCGA-D5-6541-01   | Tumor | Colon_Adenocarcinoma           | TCGA COREAD | 6042308158 | R01C01 |
| TCGA-D5-6898-01   | Tumor | Colon_Adenocarcinoma           | TCGA COREAD | 6264509087 | R04C01 |
| TCGA-D5-6898-01-2 | Tumor | Colon_Adenocarcinoma           | TCGA COREAD | 6264509087 | R06C01 |
| TCGA-D5-6922-01   | Tumor | Colon_Adenocarcinoma           | TCGA COREAD | 6264509127 | R01C01 |
| TCGA-D5-6923-01   | Tumor | Colon_Adenocarcinoma           | TCGA COREAD | 6264509127 | R04C01 |
| TCGA-D5-6924-01   | Tumor | Colon_Adenocarcinoma           | TCGA COREAD | 6264509018 | R03C01 |
| TCGA-D5-6924-01-2 | Tumor | Colon_Adenocarcinoma           | TCGA COREAD | 6264509018 | R06C02 |
| TCGA-D5-6926-01   | Tumor | Colon_Adenocarcinoma           | TCGA COREAD | 6264509018 | R01C02 |
| TCGA-D5-6930-01   | Tumor | Colon_Mucinous_Adenocarcinoma  | TCGA COREAD | 6264509087 | R02C02 |
| TCGA-D5-7000-01   | Tumor | Colon_Mucinous_Adenocarcinoma  | TCGA COREAD | 6264509018 | R04C01 |
| TCGA-DC-4745-01   | Tumor | Rectal_Adenocarcinoma          | TCGA COREAD | 6055424040 | R06C01 |
| TCGA-DC-4749-01   | Tumor | Rectal_Adenocarcinoma          | TCGA COREAD | 6055424040 | R06C02 |
| TCGA-DC-5337-01   | Tumor | Rectal_Adenocarcinoma          | TCGA COREAD | 6929718042 | R06C01 |
| TCGA-DC-5869-01   | Tumor | Rectal_Adenocarcinoma          | TCGA COREAD | 6929718058 | R06C01 |
| TCGA-DC-6154-01   | Tumor | Rectal_Adenocarcinoma          | TCGA COREAD | 6929718113 | R03C02 |
| TCGA-DC-6155-01   | Tumor | Rectal_Adenocarcinoma          | TCGA COREAD | 6929718042 | R03C02 |
| TCGA-DC-6156-01   | Tumor | Rectal_Adenocarcinoma          | TCGA COREAD | 6929718042 | R02C02 |
| TCGA-DC-6157-01   | Tumor | Rectal_Adenocarcinoma          | TCGA COREAD | 6929718058 | R02C01 |
| TCGA-DC-6158-01   | Tumor | Rectal_Adenocarcinoma          | TCGA COREAD | 6929718042 | R04C02 |
| TCGA-DC-6160-01   | Tumor | Rectal_Adenocarcinoma          | TCGA COREAD | 6929718058 | R01C02 |
| TCGA-DC-6681-01   | Tumor | Rectal_Adenocarcinoma          | TCGA COREAD | 6929718081 | R03C02 |
| TCGA-DC-6682-01   | Tumor | Rectal_Adenocarcinoma          | TCGA COREAD | 6929718081 | R01C02 |
| TCGA-DC-6683-01   | Tumor | Rectal_Adenocarcinoma          | TCGA COREAD | 6929718081 | R05C02 |
| TCGA-DM-A0X9-01   | Tumor | Colon_Adenocarcinoma           | TCGA COREAD | 6042316010 | R04C02 |
| TCGA-DM-A0XD-01   | Tumor | Colon_Adenocarcinoma           | TCGA COREAD | 6042316010 | R06C02 |
| TCGA-DM-A0XF-01   | Tumor | NA                             | TCGA COREAD | 6042316008 | R02C01 |
| TCGA-DM-A1D0-01   | Tumor | Colon_Adenocarcinoma           | TCGA COREAD | 6042316008 | R04C01 |
| TCGA-DM-A1D4-01   | Tumor | Colon_Adenocarcinoma           | TCGA COREAD | 6042316008 | R06C01 |
| TCGA-DM-A1D6-01   | Tumor | Colon_Mucinous_Adenocarcinoma  | TCGA COREAD | 6042316008 | R02C02 |
| TCGA-DM-A1D7-01   | Tumor | NA                             | TCGA COREAD | 6042316008 | R03C02 |
| TCGA-DM-A1D8-01   | Tumor | Colon_Adenocarcinoma           | TCGA COREAD | 6042316010 | R05C02 |
| TCGA-DM-A1D9-01   | Tumor | Colon_Adenocarcinoma           | TCGA COREAD | 6042316008 | R01C01 |
| TCGA-DM-A1DA-01   | Tumor | Colon_Adenocarcinoma           | TCGA COREAD | 6042316008 | R03C01 |
| TCGA-DM-A1DB-01   | Tumor | Colon_Adenocarcinoma           | TCGA COREAD | 6042316008 | R05C01 |
| TCGA-DM-A1HA-01   | Tumor | Colon_Adenocarcinoma           | TCGA COREAD | 6042316008 | R01C02 |
| TCGA-DM-A1HB-01   | Tumor | NA                             | TCGA COREAD | 6929718086 | R01C02 |
| TCGA-DM-A280-01   | Tumor | Colon_Mucinous_Adenocarcinoma  | TCGA COREAD | 6285625085 | R04C02 |
| TCGA-DM-A282-01   | Tumor | Colon_Adenocarcinoma           | TCGA COREAD | 6929671163 | R04C01 |
| TCGA-DM-A285-01   | Tumor | Colon_Mucinous_Adenocarcinoma  | TCGA COREAD | 6285625085 | R02C01 |
| TCGA-DM-A288-01   | Tumor | Colon_Mucinous_Adenocarcinoma  | TCGA COREAD | 6285625085 | R01C01 |
| TCGA-DM-A28A-01   | Tumor | Colon_Adenocarcinoma           | TCGA COREAD | 6285625085 | R05C02 |
| TCGA-DM-A28C-01   | Tumor | Colon_Adenocarcinoma           | TCGA COREAD | 6285625085 | R05C01 |
| TCGA-DM-A28E-01   | Tumor | Colon_Adenocarcinoma           | TCGA COREAD | 6285625085 | R01C02 |
| TCGA-DM-A28F-01   | Tumor | Colon_Adenocarcinoma           | TCGA COREAD | 6285625085 | R04C01 |
| TCGA-DM-A28G-01   | Tumor | Colon_Adenocarcinoma           | TCGA COREAD | 6285625085 | R06C02 |
| TCGA-DM-A28H-01   | Tumor | Colon_Adenocarcinoma           | TCGA COREAD | 6285625085 | R06C01 |
| TCGA-DM-A28K-01   | Tumor | Colon_Mucinous_Adenocarcinoma  | TCGA COREAD | 6285625085 | R03C01 |
| TCGA-DM-A28M-01   | Tumor | Colon_Adenocarcinoma           | TCGA COREAD | 6285625076 | R06C02 |
| TCGA-DT-5265-01   | Tumor | Rectal_Mucinous_Adenocarcinoma | TCGA COREAD | 6929718081 | R04C01 |
| TCGA-DY-A0XA-01   | Tumor | Rectal_Adenocarcinoma          | TCGA COREAD | 6264509055 | R02C01 |
| TCGA-DY-A1DC-01   | Tumor | Rectal_Adenocarcinoma          | TCGA COREAD | 6264509055 | R03C01 |
| TCGA-DY-A1DD-01   | Tumor | Rectal_Adenocarcinoma          | TCGA COREAD | 6264509055 | R04C01 |
| TCGA-DY-A1DE-01   | Tumor | Rectal_Adenocarcinoma          | TCGA COREAD | 6264509055 | R05C01 |
| TCGA-DY-A1DF-01   | Tumor | Rectal_Adenocarcinoma          | TCGA COREAD | 6264509055 | R06C01 |
| TCGA-DY-A1DG-01   | Tumor | Rectal_Adenocarcinoma          | TCGA COREAD | 6264509055 | R01C02 |
| TCGA-DY-A1H8-01   | Tumor | Rectal_Adenocarcinoma          | TCGA COREAD | 6264509055 | R02C02 |
| TCGA-EF-5830-01   | Tumor | Rectal_Adenocarcinoma          | TCGA COREAD | 6929718042 | R05C02 |
| TCGA-EF-5831-01   | Tumor | Rectal_Adenocarcinoma          | TCGA COREAD | 6929718042 | R06C02 |
| TCGA-EI-6506-01   | Tumor | Rectal_Adenocarcinoma          | TCGA COREAD | 6055424097 | R06C01 |
| TCGA-EI-6507-01   | Tumor | Rectal_Adenocarcinoma          | TCGA COREAD | 6055424097 | R03C01 |
| TCGA-EI-6508-01   | Tumor | Rectal_Adenocarcinoma          | TCGA COREAD | 6055424040 | R04C01 |
| TCGA-EI-6509-01   | Tumor | Rectal_Adenocarcinoma          | TCGA COREAD | 6055424040 | R02C02 |
| TCGA-EI-6510-01   | Tumor | Rectal_Adenocarcinoma          | TCGA COREAD | 6055424075 | R06C01 |
| TCGA-EI-6511-01   | Tumor | Rectal_Adenocarcinoma          | TCGA COREAD | 6055424075 | R02C02 |
| TCGA-EI-6512-01   | Tumor | Rectal_Adenocarcinoma          | TCGA COREAD | 6055424097 | R01C01 |
| TCGA-EI-6513-01   | Tumor | Rectal_Adenocarcinoma          | TCGA COREAD | 6055424075 | R05C01 |
| TCGA-EI-6514-01   | Tumor | Rectal_Adenocarcinoma          | TCGA COREAD | 6055424075 | R02C01 |
| TCGA-EI-6881-01   | Tumor | Rectal_Adenocarcinoma          | TCGA COREAD | 6929718114 | R05C02 |
| TCGA-EI-6882-01   | Tumor | Rectal_Mucinous_Adenocarcinoma | TCGA COREAD | 6929718114 | R03C02 |
| TCGA-EI-6883-01   | Tumor | Rectal_Adenocarcinoma          | TCGA COREAD | 6929718114 | R06C01 |
| TCGA-EI-6884-01   | Tumor | Rectal_Adenocarcinoma          | TCGA COREAD | 6929718114 | R02C02 |
| TCGA-EI-6885-01   | Tumor | Rectal_Adenocarcinoma          | TCGA COREAD | 6929718114 | R04C01 |
| TCGA-EI-6917-01   | Tumor | Rectal_Adenocarcinoma          | TCGA COREAD | 6929718114 | R01C02 |
| TCGA-EI-7002-01   | Tumor | Rectal_Adenocarcinoma          | TCGA COREAD | 6929718113 | R05C02 |
| TCGA-EI-7004-01   | Tumor | Rectal_Mucinous_Adenocarcinoma | TCGA COREAD | 6929718113 | R04C02 |
| TCGA-F4-6459-01   | Tumor | Colon_Adenocarcinoma           | TCGA COREAD | 6057825028 | R03C01 |
| TCGA-F4-6460-01   | Tumor | Colon_Adenocarcinoma           | TCGA COREAD | 6057825035 | R05C02 |
| TCGA-F4-6461-01   | Tumor | Colon_Adenocarcinoma           | TCGA COREAD | 6057825020 | R05C02 |
| TCGA-F4-6463-01   | Tumor | Colon_Mucinous_Adenocarcinoma  | TCGA COREAD | 6042308159 | R03C01 |
| TCGA-F4-6569-01   | Tumor | Colon_Adenocarcinoma           | TCGA COREAD | 6057825028 | R02C02 |
| TCGA-F4-6570-01   | Tumor | Colon_Adenocarcinoma           | TCGA COREAD | 6057825020 | R06C01 |
| TCGA-F4-6703-01   | Tumor | Colon_Adenocarcinoma           | TCGA COREAD | 6929718054 | R02C02 |
| TCGA-F4-6704-01   | Tumor | Colon_Mucinous_Adenocarcinoma  | TCGA COREAD | 6929718065 | R03C02 |
| TCGA-F4-6805-01   | Tumor | Colon_Adenocarcinoma           | TCGA COREAD | 6929718079 | R01C01 |
| TCGA-F4-6806-01   | Tumor | Colon_Adenocarcinoma           | TCGA COREAD | 6929718079 | R02C01 |
| TCGA-F4-6807-01   | Tumor | Colon_Adenocarcinoma           | TCGA COREAD | 6929718079 | R03C01 |
| TCGA-F4-6808-01   | Tumor | Colon_Adenocarcinoma           | TCGA COREAD | 6929718053 | R06C01 |
| TCGA-F4-6809-01   | Tumor | Colon_Adenocarcinoma           | TCGA COREAD | 6929718065 | R02C02 |
| TCGA-F4-6854-01   | Tumor | Colon_Adenocarcinoma           | TCGA COREAD | 6264509127 | R06C01 |
| TCGA-F5-6464-01   | Tumor | Rectal_Adenocarcinoma          | TCGA COREAD | 6055424040 | R05C02 |
| TCGA-F5-6465-01   | Tumor | Rectal_Adenocarcinoma          | TCGA COREAD | 6055424097 | R05C01 |
| TCGA-F5-6571-01   | Tumor | Rectal_Adenocarcinoma          | TCGA COREAD | 6929718061 | R03C01 |
| TCGA-F5-6702-01   | Tumor | Rectal_Adenocarcinoma          | TCGA COREAD | 6929718061 | R04C01 |
| TCGA-F5-6810-01   | Tumor | Rectal_Adenocarcinoma          | TCGA COREAD | 6929718058 | R05C02 |
| TCGA-F5-6811-01   | Tumor | Rectal_Adenocarcinoma          | TCGA COREAD | 6929718061 | R04C02 |
| TCGA-F5-6812-01   | Tumor | Rectal_Adenocarcinoma          | TCGA COREAD | 6929718081 | R02C02 |
| TCGA-F5-6813-01   | Tumor | Rectal_Adenocarcinoma          | TCGA COREAD | 6929718081 | R06C01 |

|                 |       |                                |             |                   |
|-----------------|-------|--------------------------------|-------------|-------------------|
| TCGA-F5-6814-01 | Tumor | Rectal_Adenocarcinoma          | TCGA COREAD | 6929718113 R06C02 |
| TCGA-F5-6861-01 | Tumor | Rectal_Adenocarcinoma          | TCGA COREAD | 6929718114 R01C01 |
| TCGA-F5-6863-01 | Tumor | Rectal_Adenocarcinoma          | TCGA COREAD | 6929718114 R03C01 |
| TCGA-F5-6864-01 | Tumor | Rectal_Adenocarcinoma          | TCGA COREAD | 6929718114 R04C02 |
| TCGA-G4-6293-01 | Tumor | Colon_Adenocarcinoma           | TCGA COREAD | 6042308159 R06C01 |
| TCGA-G4-6294-01 | Tumor | Colon_Adenocarcinoma           | TCGA COREAD | 6057825035 R04C02 |
| TCGA-G4-6295-01 | Tumor | Colon_Adenocarcinoma           | TCGA COREAD | 6042308165 R05C02 |
| TCGA-G4-6297-01 | Tumor | Colon_Adenocarcinoma           | TCGA COREAD | 6042316001 R05C01 |
| TCGA-G4-6298-01 | Tumor | Colon_Adenocarcinoma           | TCGA COREAD | 6042316015 R02C01 |
| TCGA-G4-6299-01 | Tumor | Colon_Adenocarcinoma           | TCGA COREAD | 6057825002 R04C01 |
| TCGA-G4-6302-01 | Tumor | Colon_Mucinous_Adenocarcinoma  | TCGA COREAD | 6042308158 R05C01 |
| TCGA-G4-6303-01 | Tumor | Colon_Adenocarcinoma           | TCGA COREAD | 6057825002 R01C01 |
| TCGA-G4-6306-01 | Tumor | Colon_Adenocarcinoma           | TCGA COREAD | 6057825028 R05C01 |
| TCGA-G4-6307-01 | Tumor | Colon_Adenocarcinoma           | TCGA COREAD | 6042308158 R04C01 |
| TCGA-G4-6309-01 | Tumor | Colon_Adenocarcinoma           | TCGA COREAD | 6929718053 R05C02 |
| TCGA-G4-6310-01 | Tumor | Colon_Adenocarcinoma           | TCGA COREAD | 6042316001 R03C02 |
| TCGA-G4-6311-01 | Tumor | Colon_Adenocarcinoma           | TCGA COREAD | 6042308159 R04C02 |
| TCGA-G4-6314-01 | Tumor | Colon_Adenocarcinoma           | TCGA COREAD | 6042316011 R02C01 |
| TCGA-G4-6315-01 | Tumor | Colon_Adenocarcinoma           | TCGA COREAD | 6042308158 R06C01 |
| TCGA-G4-6317-01 | Tumor | Colon_Adenocarcinoma           | TCGA COREAD | 6042316015 R04C02 |
| TCGA-G4-6320-01 | Tumor | Colon_Adenocarcinoma           | TCGA COREAD | 6042316015 R03C01 |
| TCGA-G4-6321-01 | Tumor | Colon_Adenocarcinoma           | TCGA COREAD | 6042308158 R01C02 |
| TCGA-G4-6322-01 | Tumor | Colon_Mucinous_Adenocarcinoma  | TCGA COREAD | 6042308158 R02C02 |
| TCGA-G4-6323-01 | Tumor | Colon_Adenocarcinoma           | TCGA COREAD | 6042316001 R02C02 |
| TCGA-G4-6586-01 | Tumor | Colon_Adenocarcinoma           | TCGA COREAD | 6057825020 R01C01 |
| TCGA-G4-6588-01 | Tumor | Colon_Adenocarcinoma           | TCGA COREAD | 6057825002 R06C01 |
| TCGA-G4-6625-01 | Tumor | Colon_Adenocarcinoma           | TCGA COREAD | 6057825028 R02C01 |
| TCGA-G4-6626-01 | Tumor | Colon_Adenocarcinoma           | TCGA COREAD | 6057825002 R03C01 |
| TCGA-G4-6627-01 | Tumor | Colon_Adenocarcinoma           | TCGA COREAD | 6057825002 R02C01 |
| TCGA-G4-6628-01 | Tumor | Colon_Adenocarcinoma           | TCGA COREAD | 6929718065 R04C02 |
| TCGA-G5-6233-01 | Tumor | Rectal_Adenocarcinoma          | TCGA COREAD | 6055424097 R02C01 |
| TCGA-G5-6235-01 | Tumor | Rectal_Adenocarcinoma          | TCGA COREAD | 6055424040 R05C01 |
| TCGA-G5-6572-01 | Tumor | Rectal_Adenocarcinoma          | TCGA COREAD | 6929718061 R03C02 |
| TCGA-G5-6641-01 | Tumor | Rectal_Mucinous_Adenocarcinoma | TCGA COREAD | 6929718061 R02C01 |
| TCGA-NH-A50T-01 | Tumor | Colon_Adenocarcinoma           | TCGA COREAD | 9296931074 R03C01 |
| TCGA-NH-A50U-01 | Tumor | Colon_Mucinous_Adenocarcinoma  | TCGA COREAD | 9702496157 R05C02 |
| TCGA-NH-A50V-01 | Tumor | Colon_Adenocarcinoma           | TCGA COREAD | 9296931073 R02C01 |
| TCGA-NH-A51V-01 | Tumor | Colon_Adenocarcinoma           | TCGA COREAD | 9702496157 R06C02 |
| TCGA-NH-A6GA-01 | Tumor | Colon_Adenocarcinoma           | TCGA COREAD | 9702496157 R01C02 |
| TCGA-NH-A6GB-01 | Tumor | Colon_Adenocarcinoma           | TCGA COREAD | 9702496157 R04C01 |
| TCGA-NH-A6GC-01 | Tumor | Colon_Mucinous_Adenocarcinoma  | TCGA COREAD | 3999492120 R04C01 |
| TCGA-NH-A8F7-01 | Tumor | Colon_Adenocarcinoma           | TCGA COREAD | 3999492120 R05C02 |
| TCGA-NH-A8F8-01 | Tumor | Colon_Adenocarcinoma           | TCGA COREAD | 3999492120 R01C02 |
| TCGA-QG-A5YV-01 | Tumor | Colon_Adenocarcinoma           | TCGA COREAD | 9296931074 R05C01 |
| TCGA-QG-A5YW-01 | Tumor | Colon_Mucinous_Adenocarcinoma  | TCGA COREAD | 9296931073 R04C02 |
| TCGA-QG-A5YX-01 | Tumor | Colon_Adenocarcinoma           | TCGA COREAD | 9296931073 R03C01 |
| TCGA-QG-A5Z1-01 | Tumor | Colon_Adenocarcinoma           | TCGA COREAD | 9296931074 R01C01 |
| TCGA-QG-A5Z2-01 | Tumor | Colon_Adenocarcinoma           | TCGA COREAD | 9296931073 R05C02 |
| TCGA-QL-A97D-01 | Tumor | Colon_Adenocarcinoma           | TCGA COREAD | 3999492120 R02C01 |
| TCGA-RU-A8FL-01 | Tumor | Colon_Adenocarcinoma           | TCGA COREAD | 9702496157 R02C01 |
| TCGA-SS-A7HO-01 | Tumor | NA                             | TCGA COREAD | 9702496157 R03C01 |
| TCGA-T9-A92H-01 | Tumor | Colon_Adenocarcinoma           | TCGA COREAD | 9702496157 R04C02 |
| TCGA-WS-AB45-01 | Tumor | Colon_Mucinous_Adenocarcinoma  | TCGA COREAD | 3999492120 R01C01 |

|        |       |               |                           |          |
|--------|-------|---------------|---------------------------|----------|
|        | 3331  | Normal_mucosa | Healthy                   | GSE48684 |
|        | 3332  | Normal_mucosa | Healthy                   | GSE48684 |
|        | 3333  | Normal_mucosa | Healthy                   | GSE48684 |
|        | 3999  | Normal_mucosa | Healthy                   | GSE48684 |
|        | 4000  | Normal_mucosa | Healthy                   | GSE48684 |
|        | 4001  | Normal_mucosa | Healthy                   | GSE48684 |
|        | 4002  | Normal_mucosa | Healthy                   | GSE48684 |
|        | 4003  | Normal_mucosa | Healthy                   | GSE48684 |
|        | 4004  | Normal_mucosa | Healthy                   | GSE48684 |
|        | 4005  | Normal_mucosa | Healthy                   | GSE48684 |
|        | 4006  | Normal_mucosa | Healthy                   | GSE48684 |
|        | 3325  | Normal_mucosa | Healthy                   | GSE48684 |
|        | 3326  | Normal_mucosa | Healthy                   | GSE48684 |
|        | 3327  | Normal_mucosa | Healthy                   | GSE48684 |
|        | 3328  | Normal_mucosa | Healthy                   | GSE48684 |
|        | 3329  | Normal_mucosa | Healthy                   | GSE48684 |
|        | 3330  | Normal_mucosa | Healthy                   | GSE48684 |
| CCR141 |       | Normal_mucosa | Colon_Adenocarcinoma_norm | GSE48684 |
| CCR169 |       | Normal_mucosa | Colon_Adenocarcinoma_norm | GSE48684 |
|        | 5802  | Normal_mucosa | Colon_Adenocarcinoma_norm | GSE48684 |
|        | 9043  | Normal_mucosa | Colon_Adenocarcinoma_norm | GSE48684 |
|        | 9579  | Normal_mucosa | Colon_Adenocarcinoma_norm | GSE48684 |
|        | 11827 | Normal_mucosa | Colon_Adenocarcinoma_norm | GSE48684 |
|        | 11839 | Normal_mucosa | Colon_Adenocarcinoma_norm | GSE48684 |
|        | 11879 | Normal_mucosa | Colon_Adenocarcinoma_norm | GSE48684 |
|        | 3212  | Normal_mucosa | Colon_Adenocarcinoma_norm | GSE48684 |
|        | 9047  | Normal_mucosa | Colon_Adenocarcinoma_norm | GSE48684 |
|        | 11831 | Normal_mucosa | Colon_Adenocarcinoma_norm | GSE48684 |
| CCR221 |       | Normal_mucosa | Colon_Adenocarcinoma_norm | GSE48684 |
| CCR209 |       | Normal_mucosa | Colon_Adenocarcinoma_norm | GSE48684 |
| CCR281 |       | Normal_mucosa | Colon_Adenocarcinoma_norm | GSE48684 |
| CCR289 |       | Normal_mucosa | Colon_Adenocarcinoma_norm | GSE48684 |
| CCR253 |       | Normal_mucosa | Colon_Adenocarcinoma_norm | GSE48684 |
| CCR197 |       | Normal_mucosa | Colon_Adenocarcinoma_norm | GSE48684 |
| CCR193 |       | Normal_mucosa | Colon_Adenocarcinoma_norm | GSE48684 |
| CCR217 |       | Normal_mucosa | Colon_Adenocarcinoma_norm | GSE48684 |
| CCR185 |       | Normal_mucosa | Colon_Adenocarcinoma_norm | GSE48684 |
| CCR181 |       | Normal_mucosa | Colon_Adenocarcinoma_norm | GSE48684 |
| CCR233 |       | Normal_mucosa | Colon_Adenocarcinoma_norm | GSE48684 |
| CCR139 |       | Normal_mucosa | Colon_Adenocarcinoma_norm | GSE48684 |
| CCR277 |       | Normal_mucosa | Colon_Adenocarcinoma_norm | GSE48684 |











|            |    |            |          |    |            |        |                  |    |                                                  |
|------------|----|------------|----------|----|------------|--------|------------------|----|--------------------------------------------------|
| cg18579862 | 19 | 58095595 q | ZIK1     | NA | TSS200     | island | TSS200 - island  | NA | Within telomere region                           |
| cg13668618 | 19 | 58446745 q | ZNF418   | NA | TSS200     | island | TSS200 - island  | NA | Within telomere region                           |
| cg12961842 | 19 | 58446758 q | ZNF418   | NA | TSS200     | island | TSS200 - island  | NA | Within telomere region                           |
| cg12028548 | 20 | 590799 p   | TCF15    | NA | 1stExon    | island | 1stExon - island | NA | Not overlapping Differentially Methylated Region |
| cg07113642 | 20 | 2781262 p  | CPXM1    | NA | 5'UTR      | island | 5'UTR - island   | NA | Not overlapping Differentially Methylated Region |
| cg14262681 | 20 | 21084420 p | KIZ      |    | -22204 IGR | shore  | IGR - shore      | NA | Not overlapping Differentially Methylated Region |
| cg17368760 | 20 | 23029287 p | THBD     | NA | 1stExon    | island | 1stExon - island | NA | Selected probes                                  |
| cg16339238 | 20 | 23029298 p | THBD     | NA | 1stExon    | island | 1stExon - island | NA | Selected probes                                  |
| cg22388634 | 20 | 25058429 p | VSX1     | NA | Body       | island | Body - island    | NA | Not overlapping Differentially Methylated Region |
| cg14763548 | 20 | 25062447 p | VSX1     | NA | 1stExon    | island | 1stExon - island | NA | Not overlapping Differentially Methylated Region |
| cg10615414 | 20 | 37353096 q | SLC32A1  | NA | TSS200     | island | TSS200 - island  | NA | Selected probes                                  |
| cg08313939 | 20 | 37353117 q | SLC32A1  | NA | 5'UTR      | island | 5'UTR - island   | NA | Selected probes                                  |
| cg24454144 | 20 | 37353126 q | SLC32A1  | NA | 5'UTR      | island | 5'UTR - island   | NA | Selected probes                                  |
| cg11172693 | 20 | 37434229 q | PPP1R16B | NA | TSS200     | island | TSS200 - island  | NA | Not overlapping Differentially Methylated Region |
| cg24033330 | 20 | 39317034 q | MAFB     | NA | 1stExon    | island | 1stExon - island | NA | Not overlapping Differentially Methylated Region |
| cg03403065 | 20 | 41818358 q | PTPRT    | NA | 1stExon    | island | 1stExon - island | NA | Not overlapping Differentially Methylated Region |
| cg10439765 | 20 | 44657838 q | SLC12A5  | NA | 1stExon    | island | 1stExon - island | NA | Positivity in blood                              |
| cg14060496 | 20 | 61638518 q | BHLHE23  | NA | TSS200     | island | TSS200 - island  | NA | Within telomere region                           |
| cg26492446 | 20 | 61638574 q | BHLHE23  | NA | TSS200     | island | TSS200 - island  | NA | Within telomere region                           |
| cg27501878 | 20 | 61638588 q | BHLHE23  | NA | TSS1500    | island | TSS1500 - island | NA | Within telomere region                           |
| cg15699267 | 20 | 61809557 q | MIR124-3 | NA | TSS1500    | island | TSS1500 - island | NA | Not overlapping Differentially Methylated Region |
| cg27357571 | 21 | 34398226 q | OLIG2    | NA | TSS200     | island | TSS200 - island  | NA | Not overlapping Differentially Methylated Region |
| cg00495860 | 21 | 38065524 q | SIM2     |    | -6467 IGR  | island | IGR - island     | NA | Positivity in blood                              |
| cg21697851 | 21 | 38076869 q | SIM2     | NA | Body       | island | Body - island    | NA | Not overlapping Differentially Methylated Region |
| cg10682155 | 21 | 38077473 q | SIM2     | NA | Body       | island | Body - island    | NA | Not overlapping Differentially Methylated Region |
| cg24080247 | 21 | 38082613 q | SIM2     | NA | Body       | shore  | Body - shore     | NA | Positivity in blood                              |
| cg25446076 | 21 | 38083149 q | SIM2     | NA | Body       | shore  | Body - shore     | NA | Not overlapping Differentially Methylated Region |
| cg05206884 | 22 | 33454324 q | SYN3     | NA | 5'UTR      | island | 5'UTR - island   | NA | Not overlapping Differentially Methylated Region |
| cg04198308 | 22 | 48971959 q | FAM19A5  | NA | Body       | island | Body - island    | NA | Not overlapping Differentially Methylated Region |
| cg03957481 | 22 | 50986962 q | KLHDC7B  | NA | 1stExon    | island | 1stExon - island | NA | Not overlapping Differentially Methylated Region |

**Supplementary File 1C**

| Name                  | 5'→3' Sequence (for Bisulfite converted DNA) | Mg (mM) | Tm (°C) | length (bp) | Taq (unit) | Genomic_location_hg19        | Encompassing probes from Illumina Infinium 450k.                                                |
|-----------------------|----------------------------------------------|---------|---------|-------------|------------|------------------------------|-------------------------------------------------------------------------------------------------|
| Tag1                  | TCCCGCGAAATTAATACGAC                         |         |         |             |            |                              |                                                                                                 |
| Tag2                  | GCTGGAGCTCTGCAGCTA                           |         |         |             |            |                              |                                                                                                 |
| SEPT9-FW              | TCCCGCGAAATTAATACGAC                         |         |         |             |            |                              |                                                                                                 |
| SEPT9-RV              | GCTGGAGCTCTGCAGCTA                           |         |         |             |            |                              |                                                                                                 |
| SEPT9-met-Probe       | /5Alex647N/CCGCGACCGCAACAACC                 | 1       | 56      | 75          |            | chr17:75369624-75369698      | cg12783819                                                                                      |
| SEPT9-unm-Probe       | /5Alex488N/CCACAACCAACAACC                   |         |         |             |            |                              |                                                                                                 |
| C9orf50-FW            | TCCCGCGAAATTAATACGAC                         |         |         |             |            |                              |                                                                                                 |
| C9orf50-RV            | GCTGGAGCTCTGCAGCTA                           |         |         |             |            |                              |                                                                                                 |
| C9orf50-met-Probe     | /5Alex647N/AACGCGAACGCCCCGAA                 | 1.5     | 50      | 114         |            | chr9:132382394-132382507     | cg14015706                                                                                      |
| C9orf50-unm-Probe     | /5Alex488N/AACACAACACCCCCAAA                 |         |         |             |            |                              |                                                                                                 |
| GRIA4-FW              | TCCCGCGAAATTAATACGAC                         |         |         |             |            |                              |                                                                                                 |
| GRIA4-RV              | GCTGGAGCTCTGCAGCTA                           |         |         |             |            |                              |                                                                                                 |
| GRIA4-met-Probe       | /5Alex647N/AACGCCGCGACCGCCACAC               | 1.5     | 62      | 106         |            | chr11:105481255-105481360    | cg15603568;cg23559689;cg00343633;cg03225817;cg04747226;cg07972135                               |
| GRIA4-unm-Probe       | /5Alex488N/CACCACAACCACCACACACA              |         |         |             |            |                              |                                                                                                 |
| MSC-FW                | TCCCGCGAAATTAATACGAC                         |         |         |             |            |                              |                                                                                                 |
| MSC-RV                | GCTGGAGCTCTGCAGCTA                           |         |         |             |            |                              |                                                                                                 |
| MSC-met-Probe         | /5Alex647N/CGCATCCGAACACGCTCAC               | 1.5     | 58      | 122         |            | chr8:72756000-72756121       | cg25832771                                                                                      |
| MSC-unm-Probe         | /5Alex488N/ACACATCCAAACACACTCAC              |         |         |             |            |                              |                                                                                                 |
| EYA4-FW               | TCCCGCGAAATTAATACGAC                         |         |         |             |            |                              |                                                                                                 |
| EYA4-RV               | GCTGGAGCTCTGCAGCTA                           |         |         |             |            |                              |                                                                                                 |
| EYA4-met-Probe        | /5Alex647N/GACCGTTCCCGACTTCCGC               | 2       | 54      | 96          |            | chr6:133562421-133562516     | cg05085230; cg08712932; cg06132028; cg11942956; cg20787173; cg11664500; cg14287112; cg22871668; |
| EYA4-Unmet-Probe      | /5Alex488N/CACTCCAACCATTTCCCA                |         |         |             |            |                              |                                                                                                 |
| MAP3K14-AS1-FW        | TCCCGCGAAATTAATACGAC                         |         |         |             |            |                              |                                                                                                 |
| MAP3K14-AS1-RV        | GCTGGAGCTCTGCAGCTA                           |         |         |             |            |                              |                                                                                                 |
| MAP3K14-AS1-met-Probe | /5Alex647N/CGACGACATCACAACACCGACG            | 2.5     | 50      | 99          |            | chr17:43339469-43339567      | cg17222164; cg03048083; cg01627847; cg08124910                                                  |
| MAP3K14-AS1-unm-Probe | /5Alex488N/CAACAACATCACAACACCAACA            |         |         |             |            |                              |                                                                                                 |
| ITGA4-FW              | TCCCGCGAAATTAATACGAC                         |         |         |             |            |                              |                                                                                                 |
| ITGA4-RV              | GCTGGAGCTCTGCAGCTA                           |         |         |             |            |                              |                                                                                                 |
| ITGA4-met-Probe       | /5Alex647N/ACCCGCTAACGCCGAACACGCTA           | 2.5     | 50      | 76          |            | chr2:182,322,231-182,322,306 | cg06952671; cg21995919                                                                          |
| ITGA4-unm-Probe       | /5Alex488N/ACCCACTAACACCAACACACTA            |         |         |             |            |                              |                                                                                                 |

| Name       | Catalog #      | Tm(°C) |
|------------|----------------|--------|
| BRAF V600E | dHsaCP2000027  | 55     |
| KRAS G13D  | dHsaMDV2510598 | 55     |
| KRAS G12D  | dHsaMDV2510596 | 55     |
| KRAS G12A  | dHsaMDV2510586 | 55     |
| KRAS G12R  | dHsaMDV2510590 | 55     |
| KRAS G12V  | dHsaMDV2510592 | 55     |
| KRAS G12C  | dHsaMDV2510584 | 55     |
| KRAS Q61H  | dHsaMDV2010131 | 55     |
| MET CNV    | dHsaCP2500321  | 60     |

**Supplementary File 1D**

**Clinical data summary for the two cohorts of  
cfDNA donors involved in the study**

| <b>Aging Cohort</b> | N       | (%)  |
|---------------------|---------|------|
| <b>Sex</b>          | 25      | (50) |
|                     | 25      | (50) |
| <b>Age (years)</b>  | 61      |      |
|                     | [40-65] |      |

| <b>mCRC cohort</b>                 | N                 | (%)    |
|------------------------------------|-------------------|--------|
| <b>Sex</b>                         | Male 117          | (64.3) |
|                                    | Female 65         | (35.7) |
| <b>Age (years)</b>                 | median 64         |        |
|                                    | Range [33-85]     |        |
| <b>CEA (ng/ml)</b>                 | median 66.1       |        |
|                                    | Range [0.8-20543] |        |
|                                    | <=5 27            | (14.9) |
|                                    | >5 154            | (85.1) |
|                                    | NA 1              | (0.6)  |
| <b># previous treatment lines</b>  | 0 38              | (20.9) |
|                                    | 1 19              | (10.4) |
|                                    | 2 43              | (23.6) |
|                                    | 3 37              | (20.3) |
|                                    | 4+ 45             | (24.7) |
| <b>RECIST (mm)<br/>(quartiles)</b> | [9-49.25[ 44      | (24.3) |
|                                    | [49.25-81.55[ 43  | (23.8) |
|                                    | [81.55-117[ 42    | (23.2) |
|                                    | [117-250] 45      | (24.9) |
|                                    | NA 7              | (3.9)  |
| <b>Primary tumor resected</b>      | Yes 150           | (82.9) |
|                                    | No 31             | (17.1) |
| <b>Metastatic lesions</b>          | 1 49              | (26.9) |
|                                    | 2+ 128            | (70.3) |
|                                    | NA 5              | (2.7)  |
| <b>Bulky Disease</b>               | No 122            | (67)   |
|                                    | Yes 47            | (25.8) |
|                                    | NA 13             | (7.1)  |
| <b>RAS</b>                         | wild type 107     | (58.8) |
|                                    | mutated 75        | (41.2) |
|                                    | NA 0              | (0)    |
| <b>BRAF</b>                        | wild type 133     | (73.1) |
|                                    | mutated 13        | (7.1)  |
|                                    | NA 36             | (19.8) |













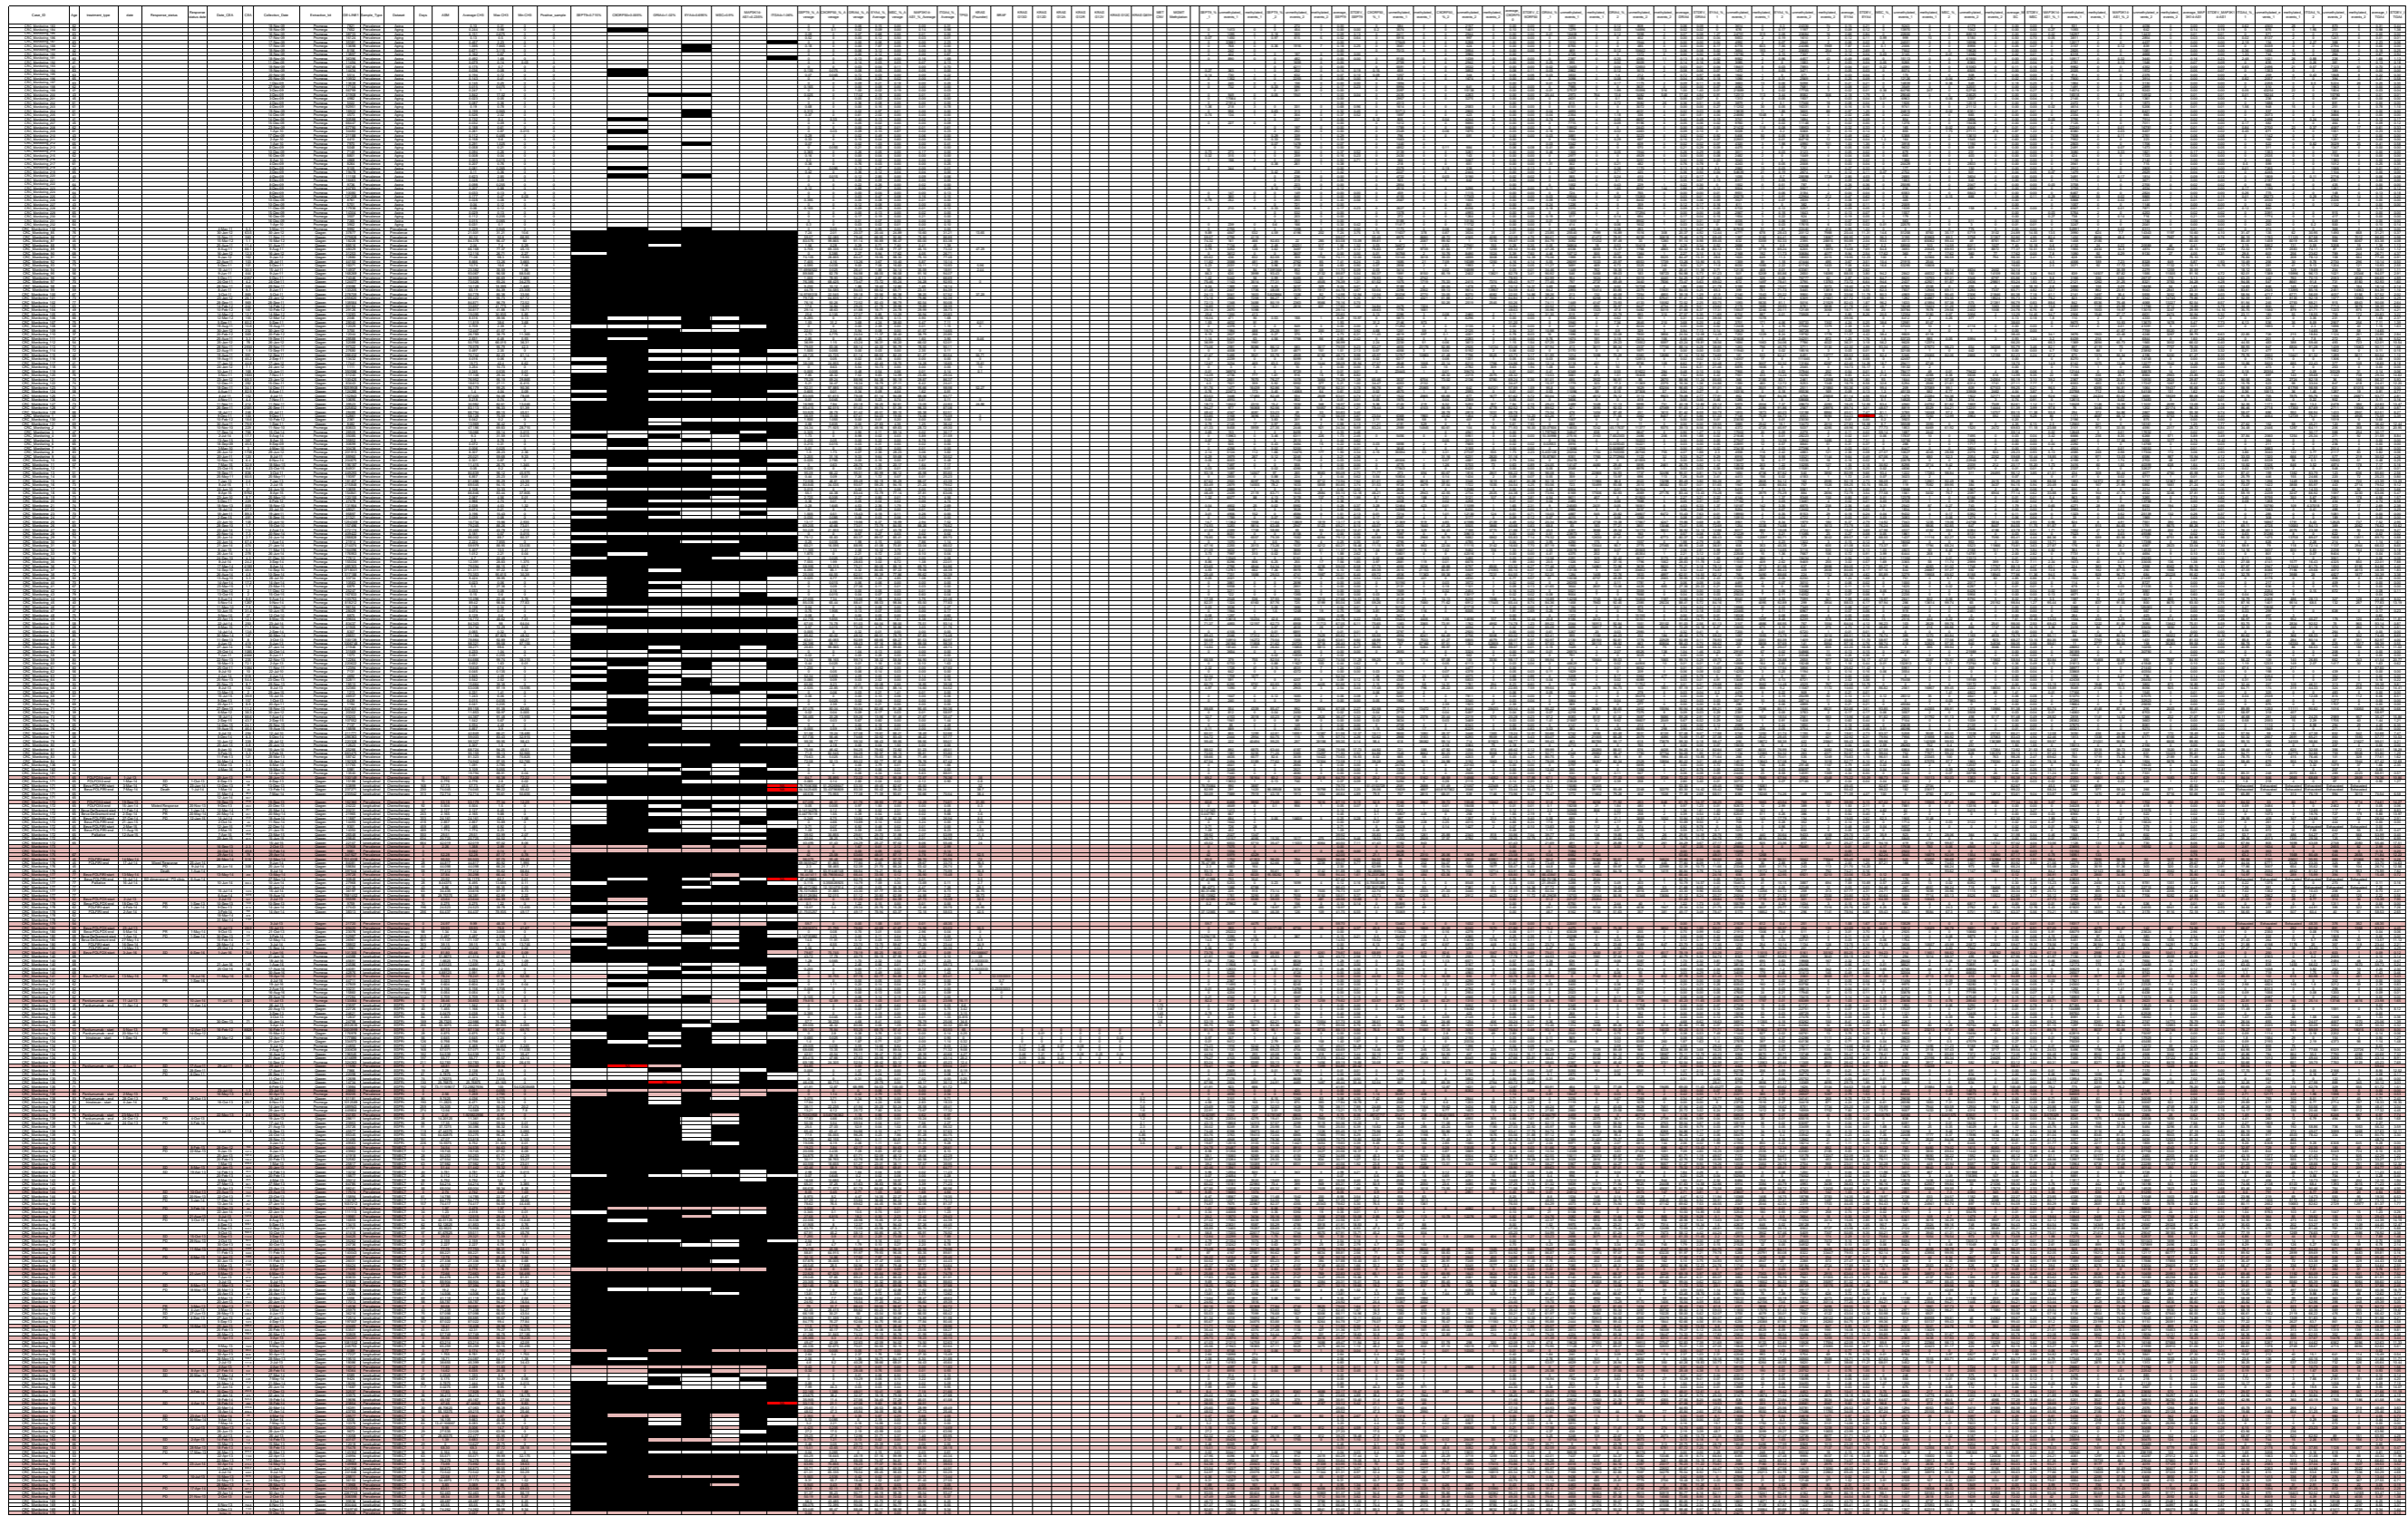

## Supplementary File 1H

Association between clinico-pathological features and circulating DNA methylation

|                                    | Median                                                                                     | pvalue                                                       |
|------------------------------------|--------------------------------------------------------------------------------------------|--------------------------------------------------------------|
| <b>Sex</b>                         | Female 38.30<br>Male 11.80                                                                 | <b>0.029</b>                                                 |
| <b>Age (years)</b>                 | [33-54.7[ 23.25<br>[54.7-62.9[ 12.80<br>[62.9-72.7[ 12.40<br>[72.7-85.2] 17.85             | <i>ns</i>                                                    |
| <b>CEA (ng/ml)</b>                 | <=5 2.97<br>>5 18.61                                                                       | <i>ns</i>                                                    |
| <b>RECIST (mm)<br/>(quartiles)</b> | [9-49.25[ 2.00<br>[49.25-81.55[ 20.80<br>[81.55-117[ 12.90<br>[117-250] 29.30              | <i>ref.</i><br><b>0.06</b><br><i>ns</i><br><b>0.006</b>      |
| <b>GE/ml<br/>(quartiles)</b>       | [1110-19613[ 3.13<br>[19613-40107[ 17.11<br>[40107-137394[ 18.07<br>[137394-9259908] 33.80 | <i>ref.</i><br><i>ns</i><br><b>0.001</b><br><b>&lt;0.001</b> |
| <b>Primary tumor intact</b>        | No 12.42<br>Yes 53.18                                                                      | <b>0.001</b>                                                 |
| <b>Metastatic lesions</b>          | 1 5.50<br>2+ 22.44                                                                         | <b>0.038</b>                                                 |
| <b>Bulky disease</b>               | No 11.84<br>Yes 38.96                                                                      | <b>0.002</b>                                                 |
| <b>RAS</b>                         | wild type 13.97<br>mutated 17.83                                                           | <i>ns</i>                                                    |
| <b>BRAF</b>                        | wild type 15.66<br>mutated 47.45                                                           | <i>ns</i>                                                    |
| <b>Under treatment</b>             | No 18.35<br>Yes 12.65                                                                      | <i>ns</i>                                                    |



|                    |           |    |      |       |   |           |     |     |     |   |      |   |       |      |   |      |
|--------------------|-----------|----|------|-------|---|-----------|-----|-----|-----|---|------|---|-------|------|---|------|
| CRC_Monitoring_162 | 26-Jul-13 | 57 | 28.0 | 18.0  |   | 12-Jul-13 | 43  | -14 | 108 |   | 36.7 | X | 24.1  | 1.40 | 0 | 27.8 |
| CRC_Monitoring_163 | 14-Feb-13 | 0  | 1.4  | 0.0   |   | 23-Jan-13 | -22 | -22 | 190 | n |      |   | 1.4   | 4.00 | 1 | 1.8  |
| CRC_Monitoring_163 | 15-Mar-13 | 29 | 0.0  | -1.4  | x | 2-Apr-13  | 47  | 18  | 194 |   | 2.1  | X | 1.2   | 4.00 | 1 | 1.8  |
| CRC_Monitoring_164 | 18-Feb-13 | 0  | 68.3 | 0.0   |   | 20-Feb-13 | 2   | 2   | 142 | n |      |   | 517.2 | 2.80 | 1 | 69.7 |
| CRC_Monitoring_164 | 26-Mar-13 | 36 | 0.2  | -68.1 | x | 28-Mar-13 | 38  | 2   | 140 |   | -1.4 | X | 972.2 | 2.80 | 1 | 69.7 |
| CRC_Monitoring_164 | 22-Apr-13 | 63 | 55.6 | -12.7 |   |           |     |     |     |   |      |   | 1104  | 2.80 | 1 | 69.7 |
| CRC_Monitoring_164 | 22-May-13 | 93 | 76.3 | 8.0   |   | 17-May-13 | 88  | -5  | 152 | y | 7    |   | 1412  | 2.80 | 1 | 69.7 |
| CRC_Monitoring_165 | 14-May-14 | 0  | 74.0 | 0.0   |   | 14-May-14 | 0   | 0   | 147 |   |      |   | 274.2 | 1.30 | 0 | 25.3 |
| CRC_Monitoring_165 | 11-Jun-14 | 28 | 56.9 | -17.1 | x | 23-Jun-14 | 40  | 12  | 176 |   | 19.7 | X | 830.2 | 1.30 | 0 | 25.3 |
| CRC_Monitoring_165 | 9-Jul-14  | 56 | 72.5 | -1.5  |   |           |     |     |     | n |      |   | 2207  | 1.30 | 0 | 25.3 |
| CRC_Monitoring_166 | 14-May-13 | 0  | 22.6 | 0.0   |   | 23-May-13 | 9   | 9   | 48  |   |      |   | 57.5  | 1.57 | 0 | 16.6 |
| CRC_Monitoring_166 | 24-May-13 | 10 | 54.5 | 31.9  | x | 10-Jul-13 | 57  | 47  | 79  |   | 64.6 | X | 63.7  | 1.57 | 0 | 16.6 |
| CRC_Monitoring_168 | 3-Mar-14  | 0  | 83.5 | 0.0   |   | 5-Feb-14  | -26 | -26 | 85  |   |      |   | 421.4 | 1.40 | 0 | 81.0 |
| CRC_Monitoring_168 | 30-Apr-14 | 58 | 92.5 | 9.0   | x | 17-Apr-14 | 45  | -13 | 117 | y | 37.6 | X | 1065  | 1.40 | 0 | 81.0 |
| CRC_Monitoring_169 | 2-Oct-13  | 0  | 48.3 | 0.0   |   | 4-Oct-13  | 2   | 2   | 108 | n |      |   | 342.8 | 1.40 | 0 | 19.8 |
| CRC_Monitoring_169 | 9-Oct-13  | 7  | 48.5 | 0.1   | x |           |     |     |     |   |      |   |       | 1.40 | 0 | 19.8 |
| CRC_Monitoring_169 | 6-Nov-13  | 35 | 65.6 | 17.2  |   |           |     |     |     |   |      |   | 794.8 | 1.40 | 0 | 19.8 |
| CRC_Monitoring_169 | 5-Dec-13  | 64 | 74.3 | 25.9  |   | 21-Nov-13 | 50  | -14 | 135 | y | 25   | X | 1144  | 1.40 | 0 | 19.8 |
